# Supplementary material
Source: publisher figshare collection journal article supplement (https://tandf.figshare.com/articles/dataset/_/1206367)

# A BAYESIAN NON-LINEAR MIXED EFFECTS REGRESSION MODEL FOR THE CHARACTERISATION OF EARLY BACTERICIDAL ACTIVITY OF TUBERCULOSIS DRUGS

Divan Aristo Burger<sup>1,2</sup> and Robert Schall<sup>1,2</sup>

<sup>1</sup>*Department of Mathematical Statistics and Actuarial Science, University of the Free State, Bloemfontein, South Africa*

<sup>2</sup>*Quintiles Biostatistics, Bloemfontein, South Africa*

SUPPLEMENTARY MATERIAL

## A EMPIRICAL STUDY

**Figure A.1:** Observed and Fitted log(CFU) Count

Trial **CL001**, Treatment **TMC207 100 mg**

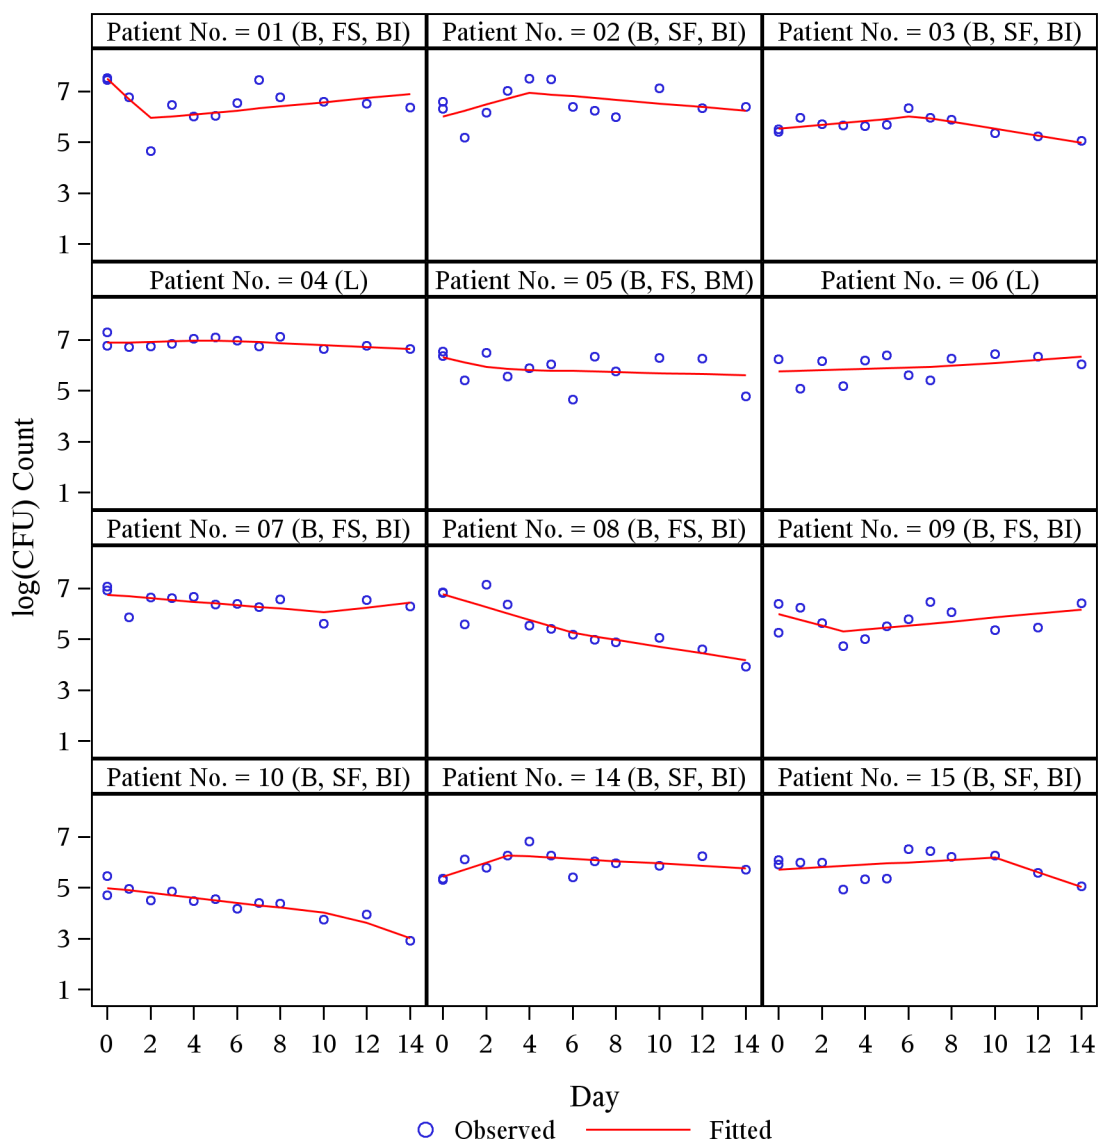

**Figure A.2:** Observed and Fitted log(CFU) Count

Trial **CL001**, Treatment **TMC207 200 mg**

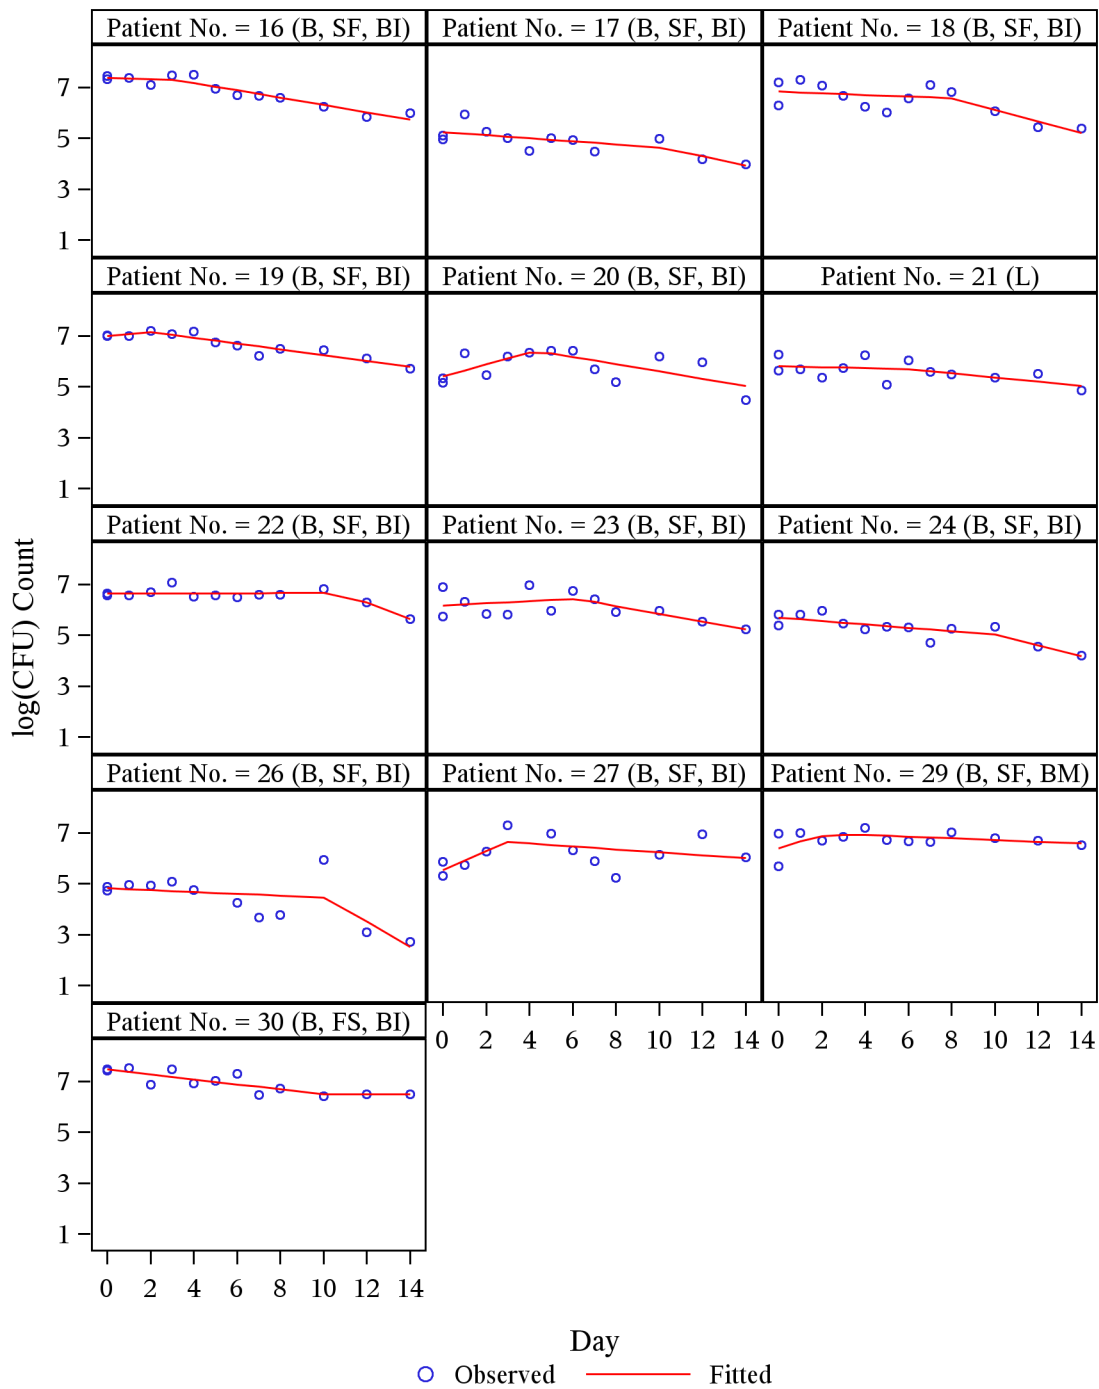

**Figure A.3:** Observed and Fitted log(CFU) Count

Trial **CL001**, Treatment **TMC207 300 mg**

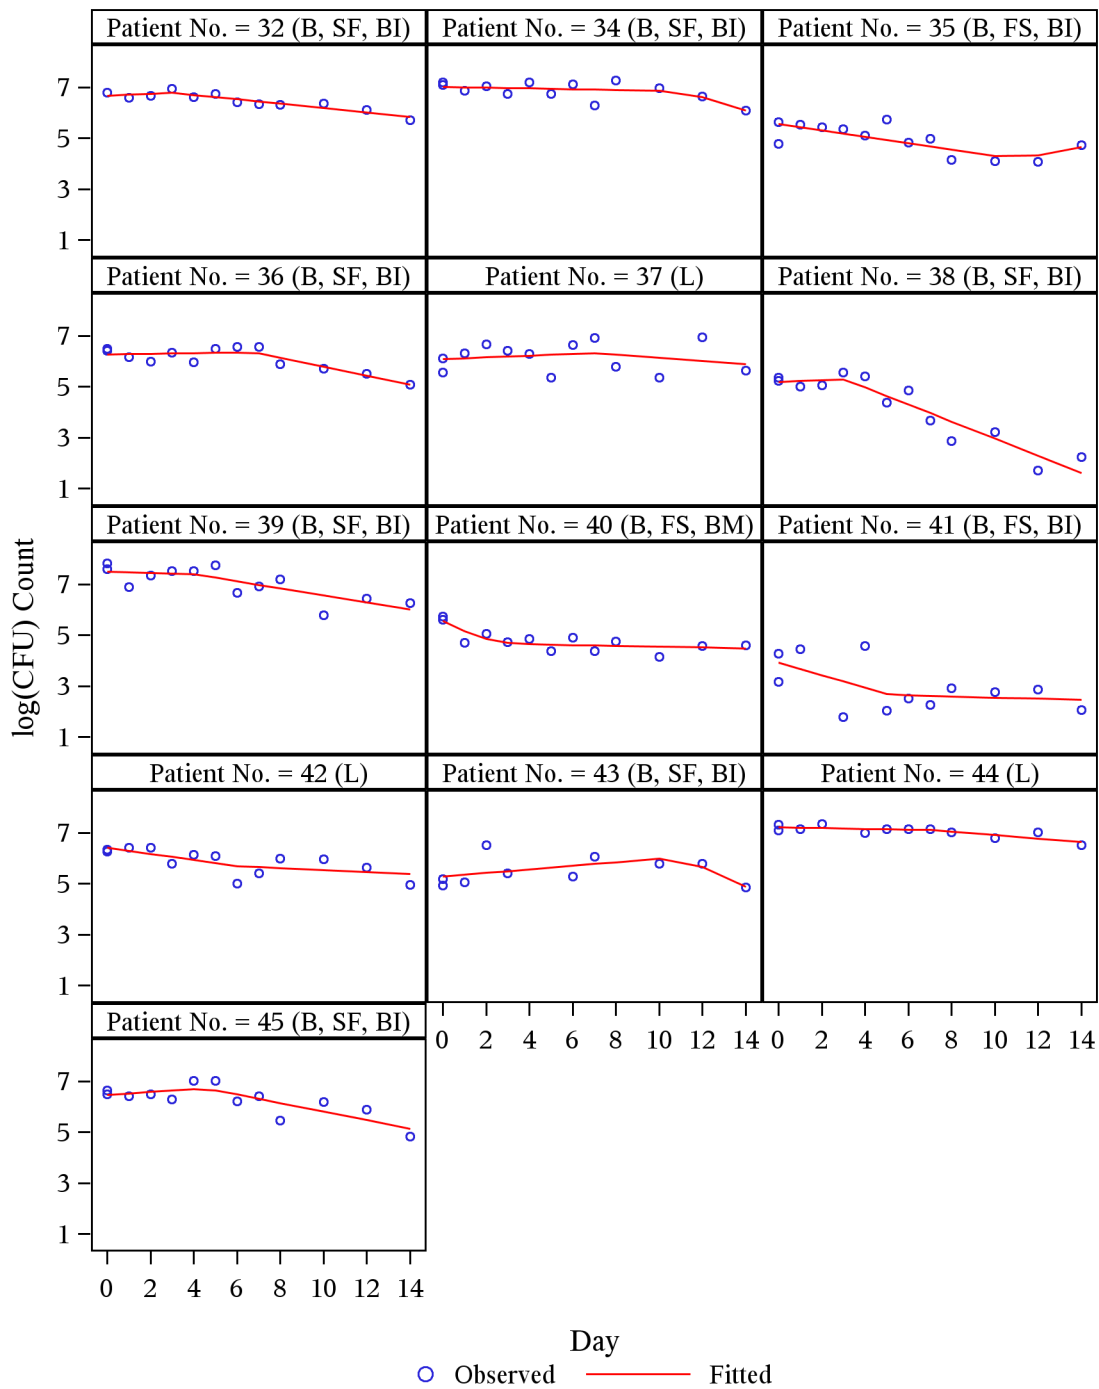

**Figure A.4:** Observed and Fitted log(CFU) Count

Trial **CL001**, Treatment **TMC207 400 mg**

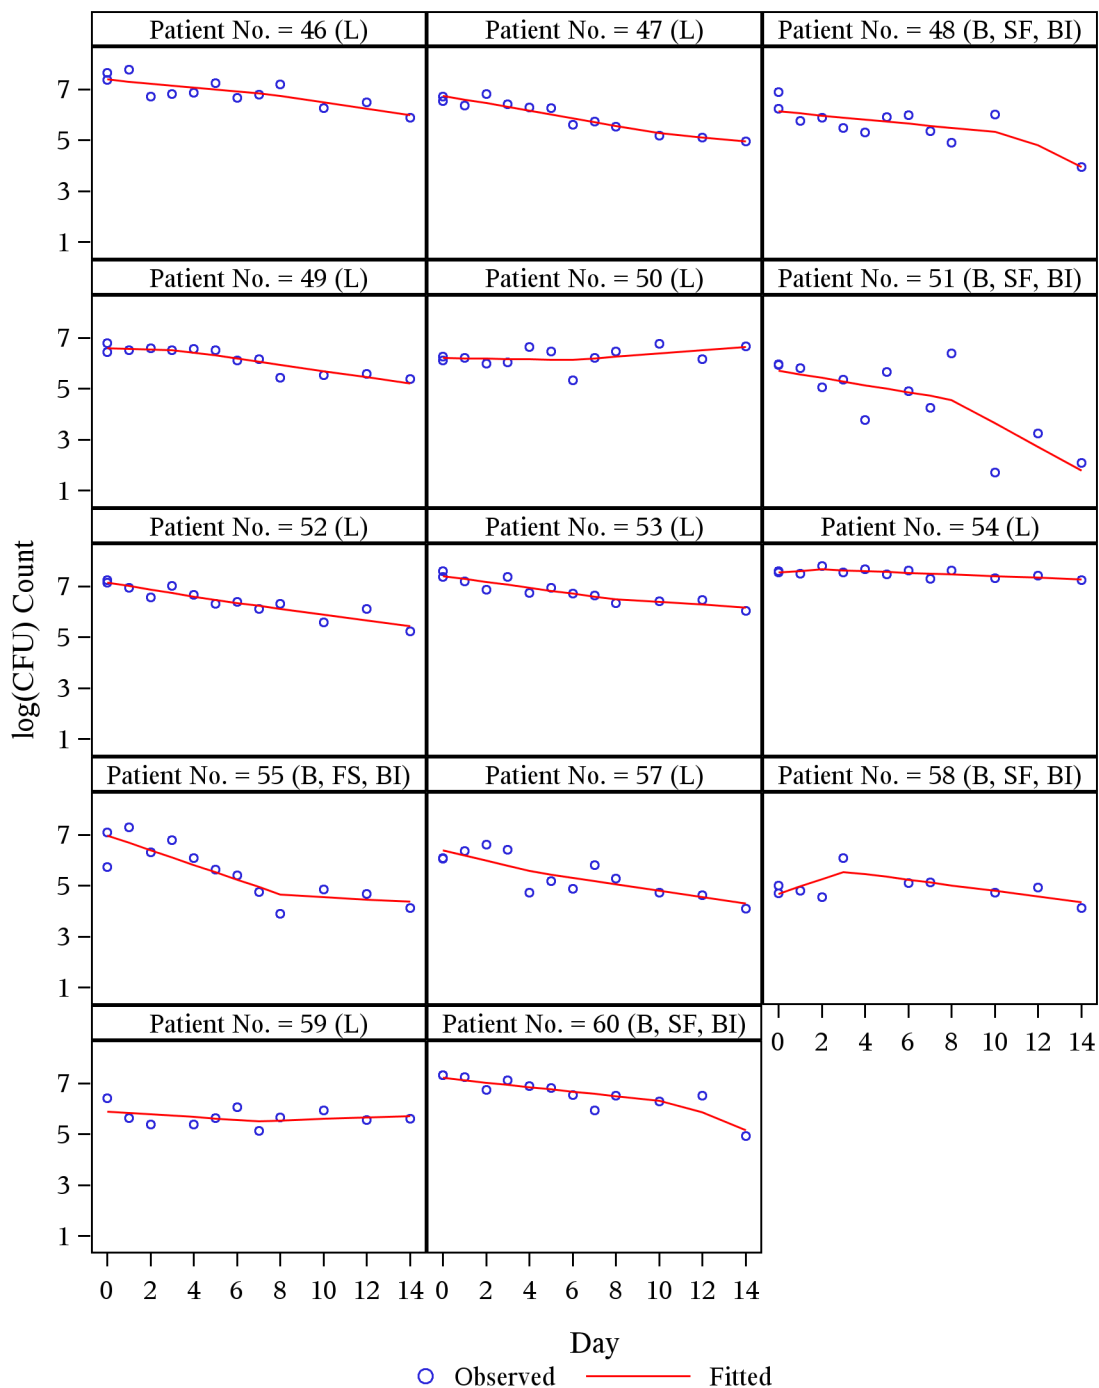

**Figure A.5:** Observed and Fitted  $\log(\text{CFU})$  Count  
 Trial **CL001**, Treatment **Rifafour**

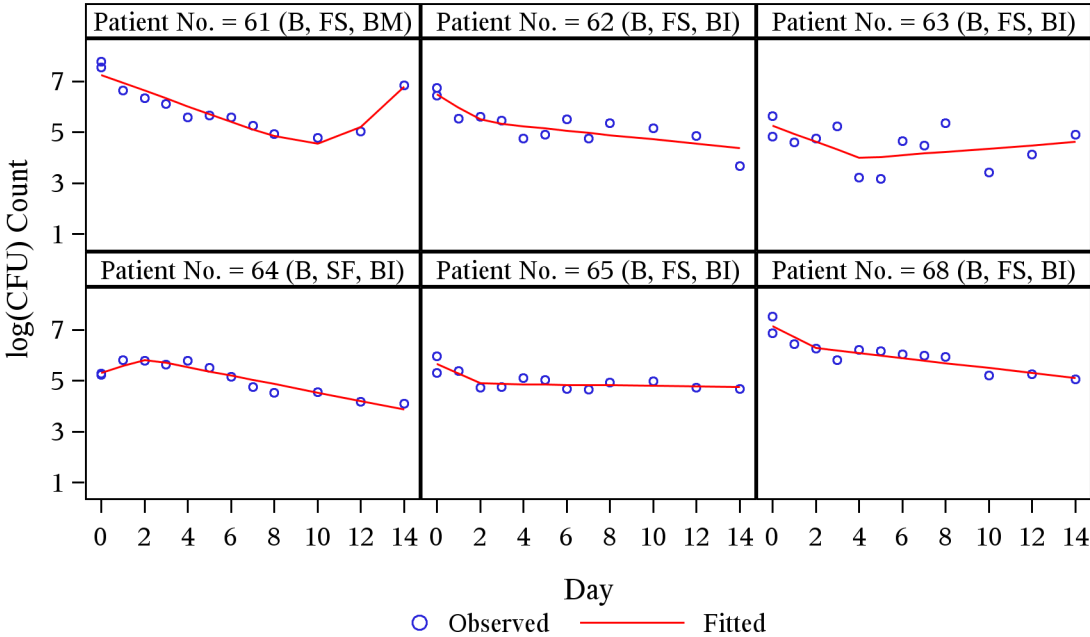

**Figure A.6:** Observed and Fitted log(CFU) Count

Trial **CL007**, Treatment **PA-824 200 mg**

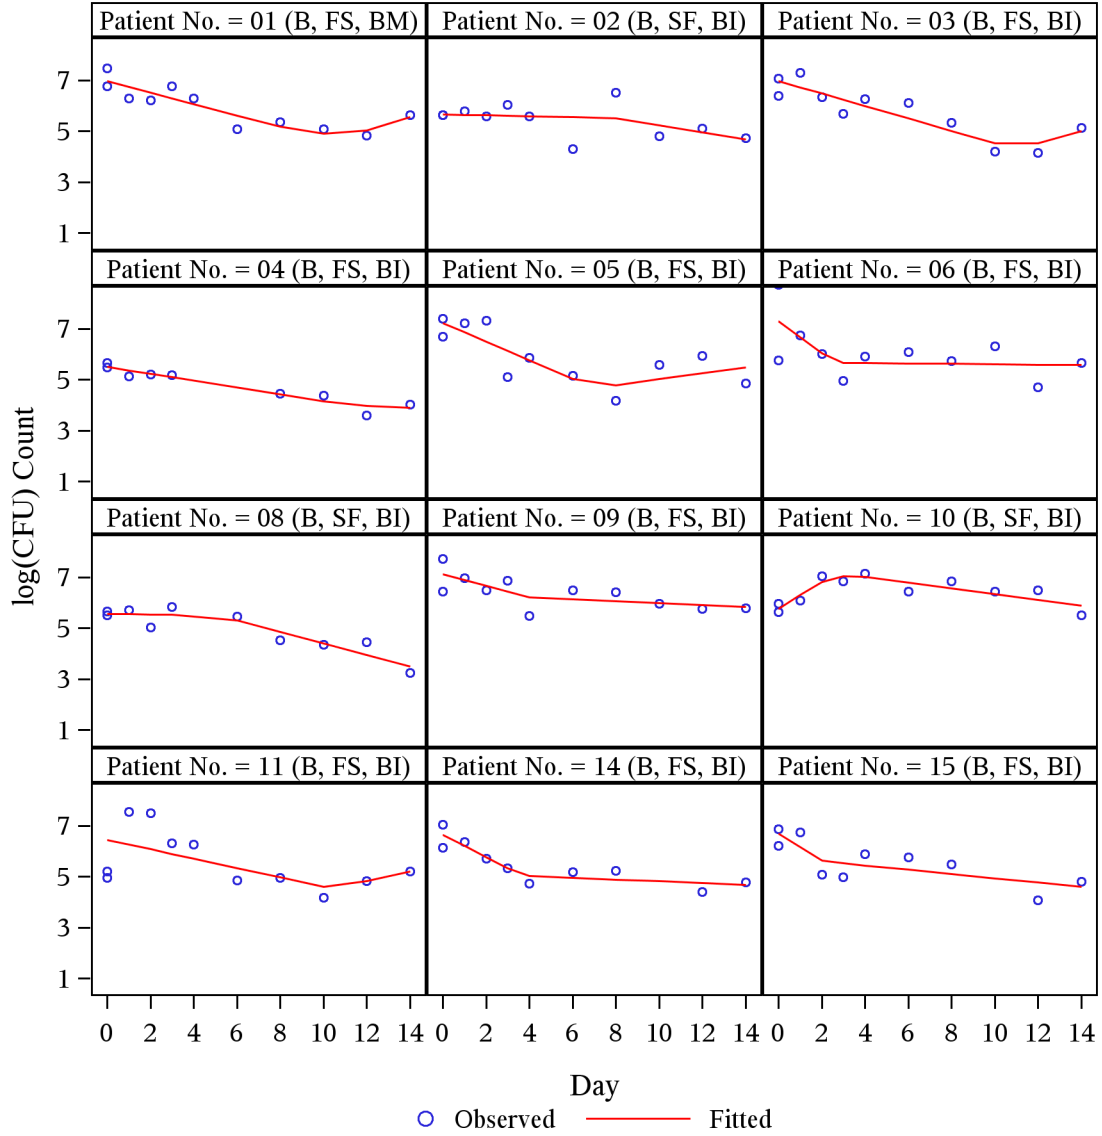



**Figure A.7:** Observed and Fitted log(CFU) Count

Trial **CL007**, Treatment **PA-824 600 mg**

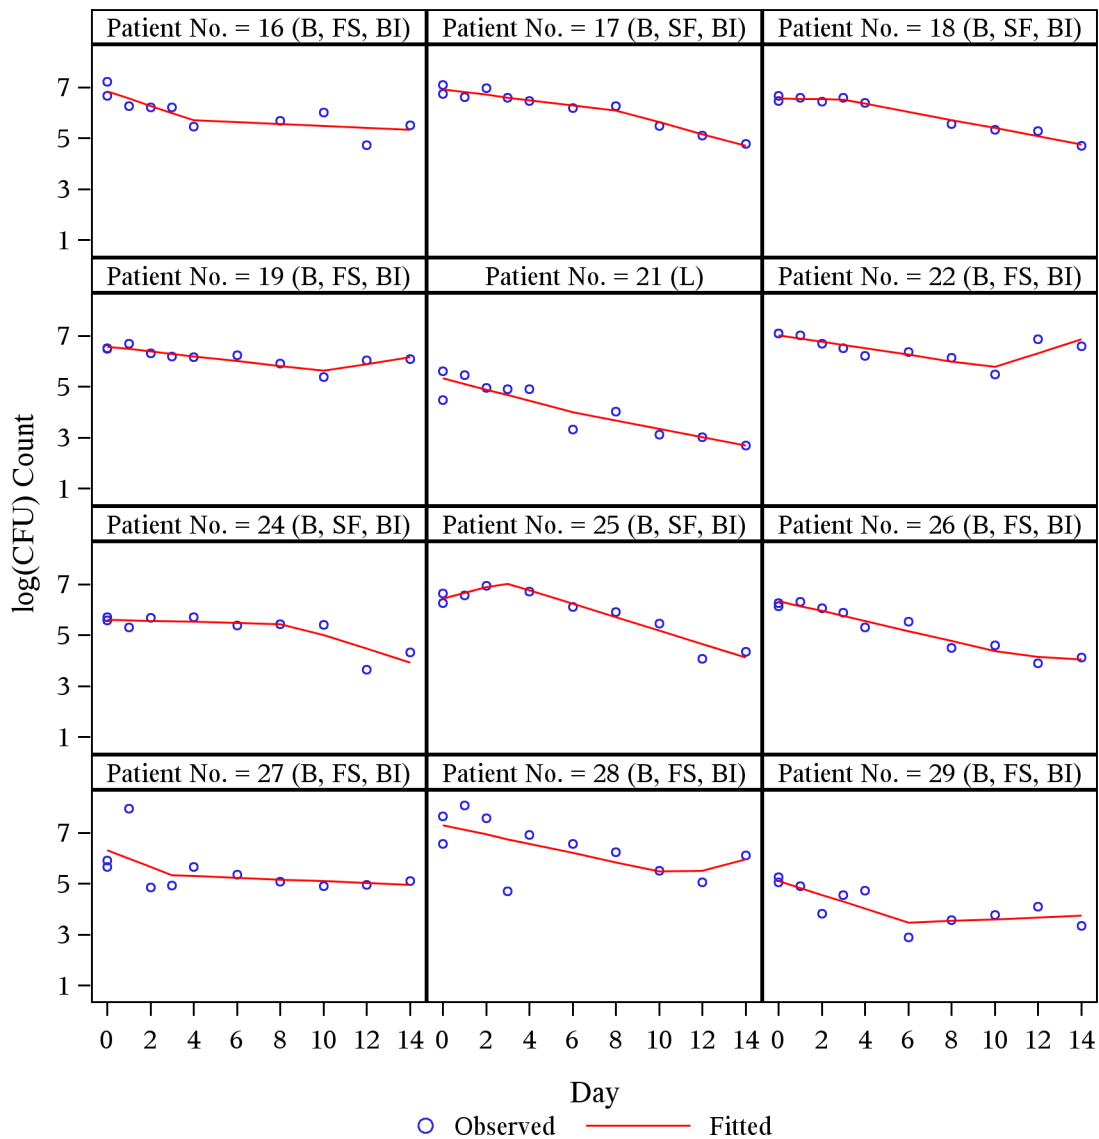

**Figure A.8:** Observed and Fitted log(CFU) Count

Trial **CL007**, Treatment **PA-824 1000 mg**

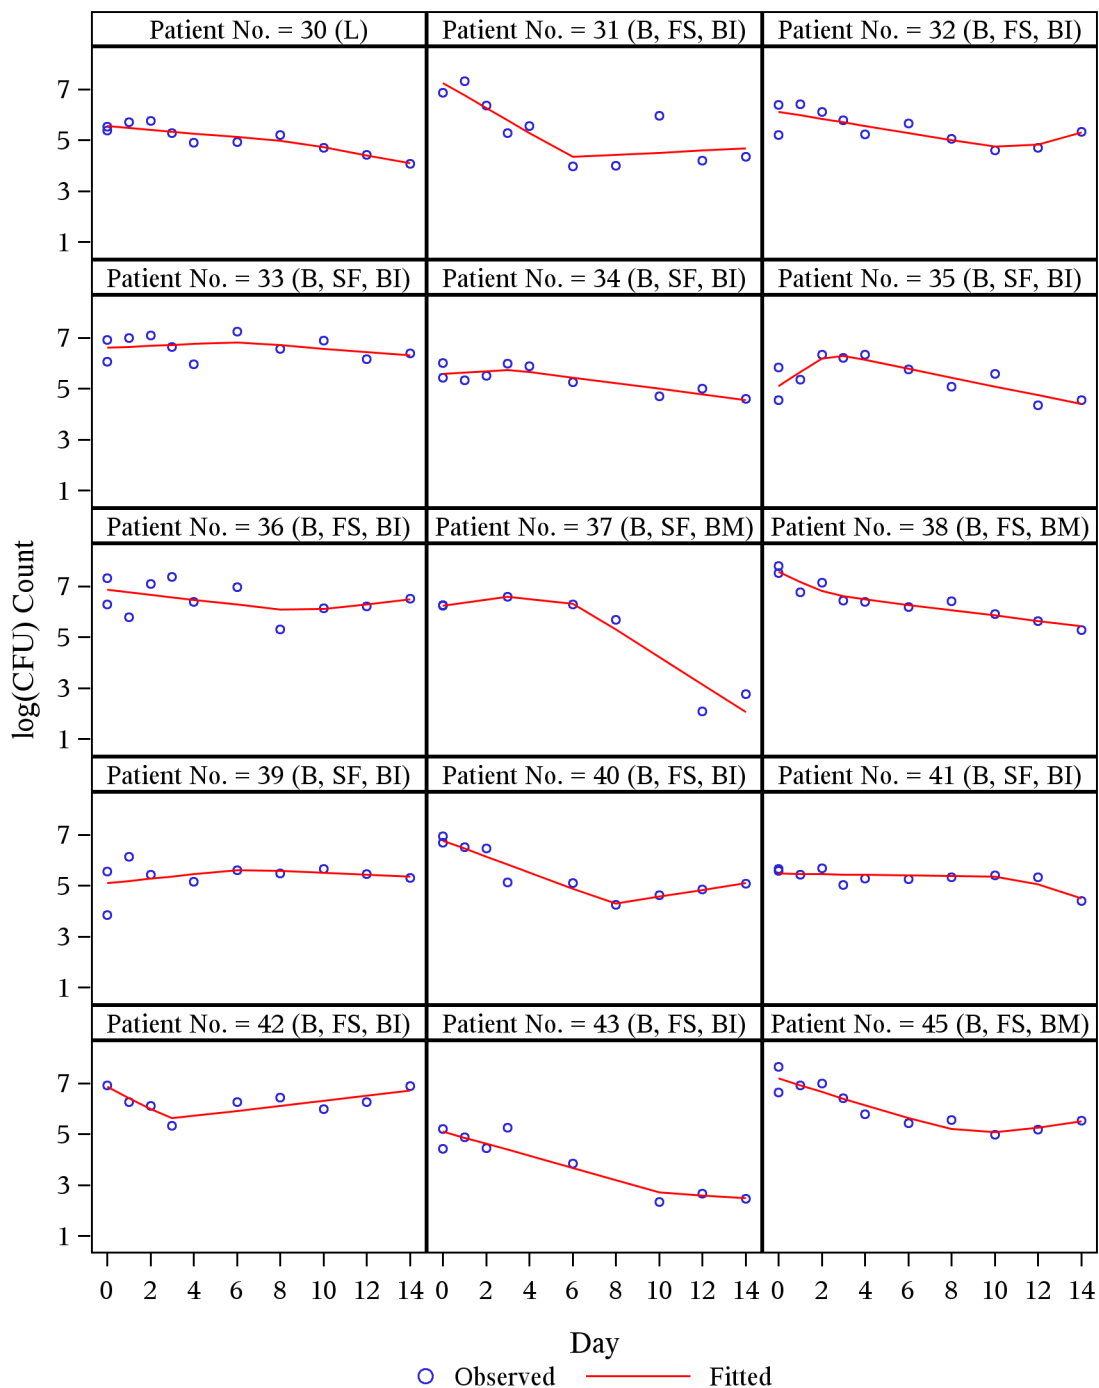

**Figure A.9:** Observed and Fitted log(CFU) Count

Trial **CL007**, Treatment **PA-824 1200 mg**

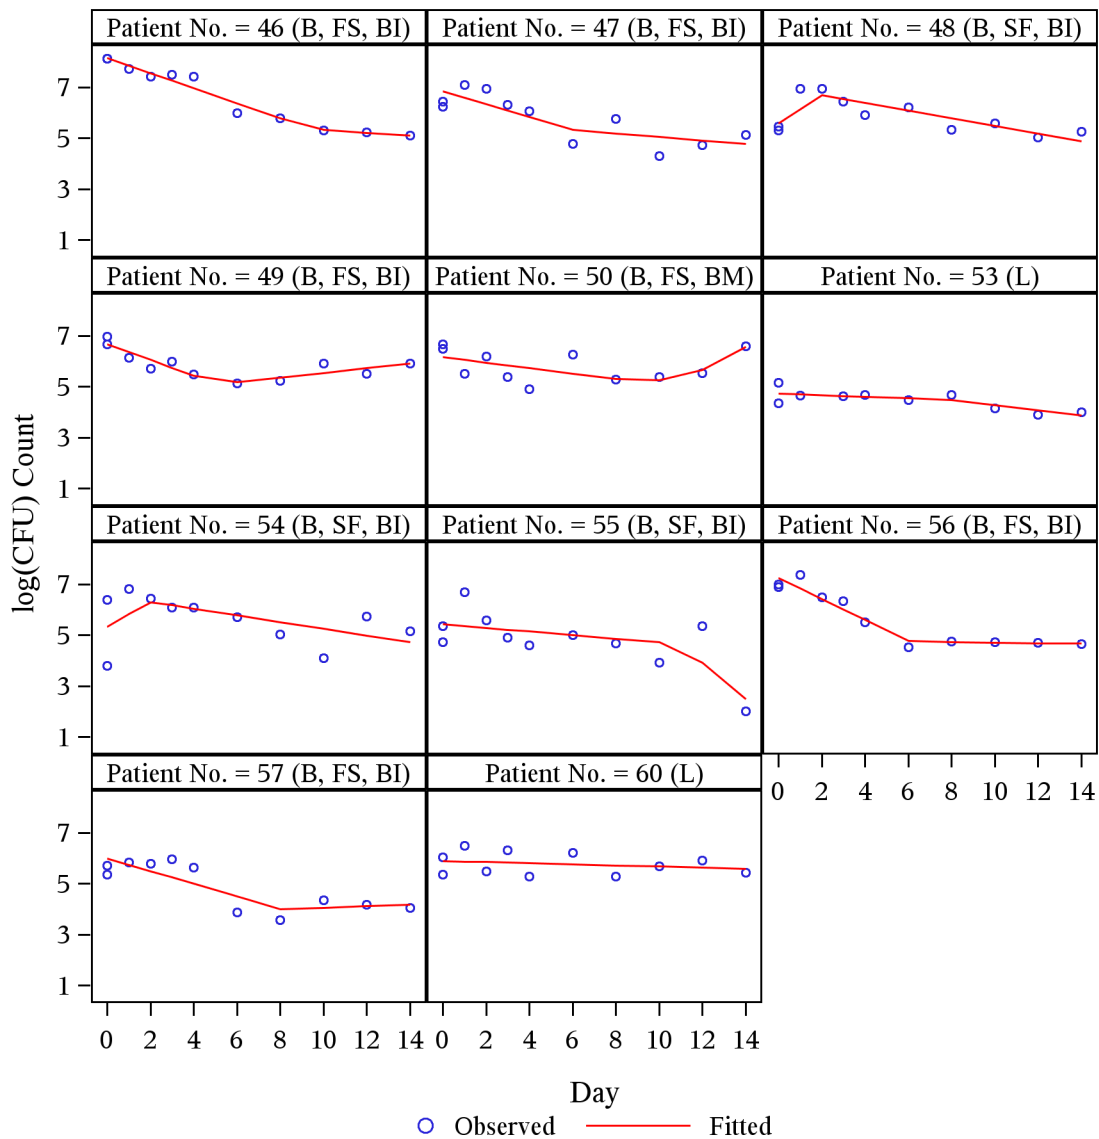

**Figure A.10:** Observed and Fitted  $\log(\text{CFU})$  Count

Trial **CL007**, Treatment **Rifafour**

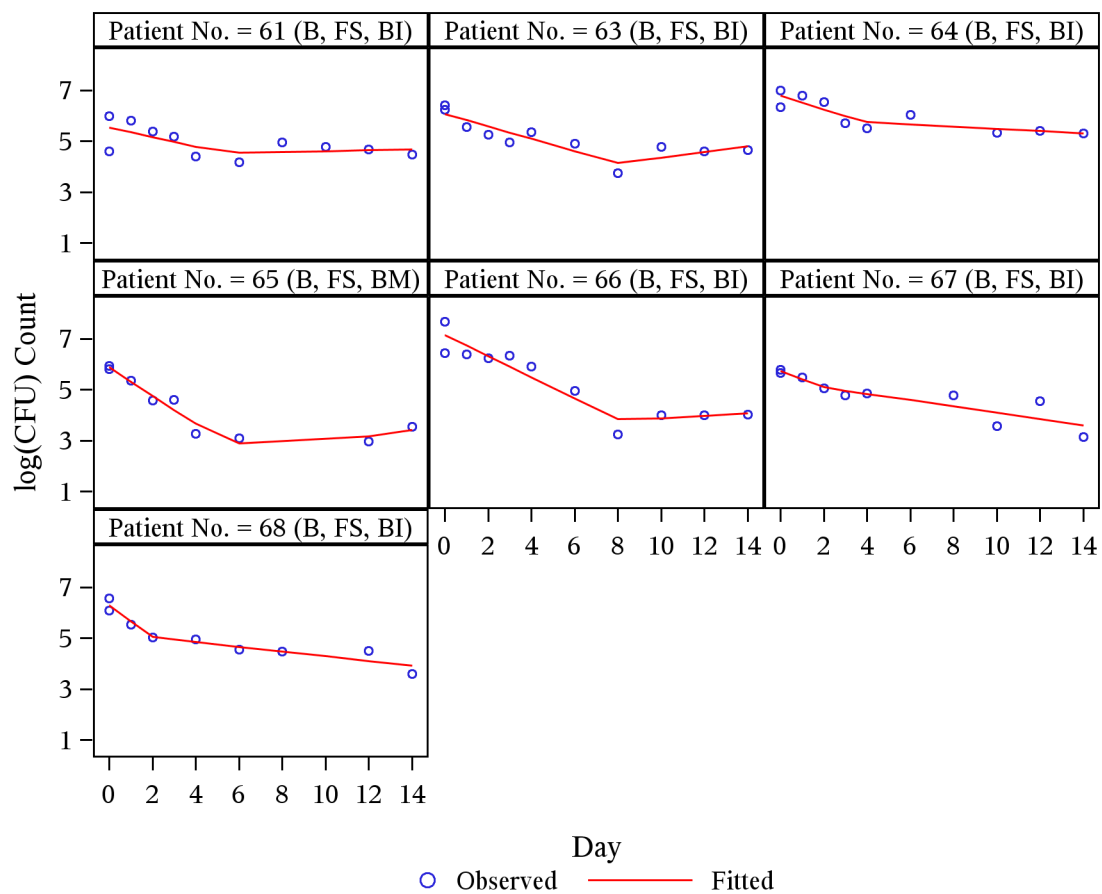

**Figure A.11:** Observed and Fitted log(CFU) Count

Trial **CL010**, Treatment **PA-824 50 mg**

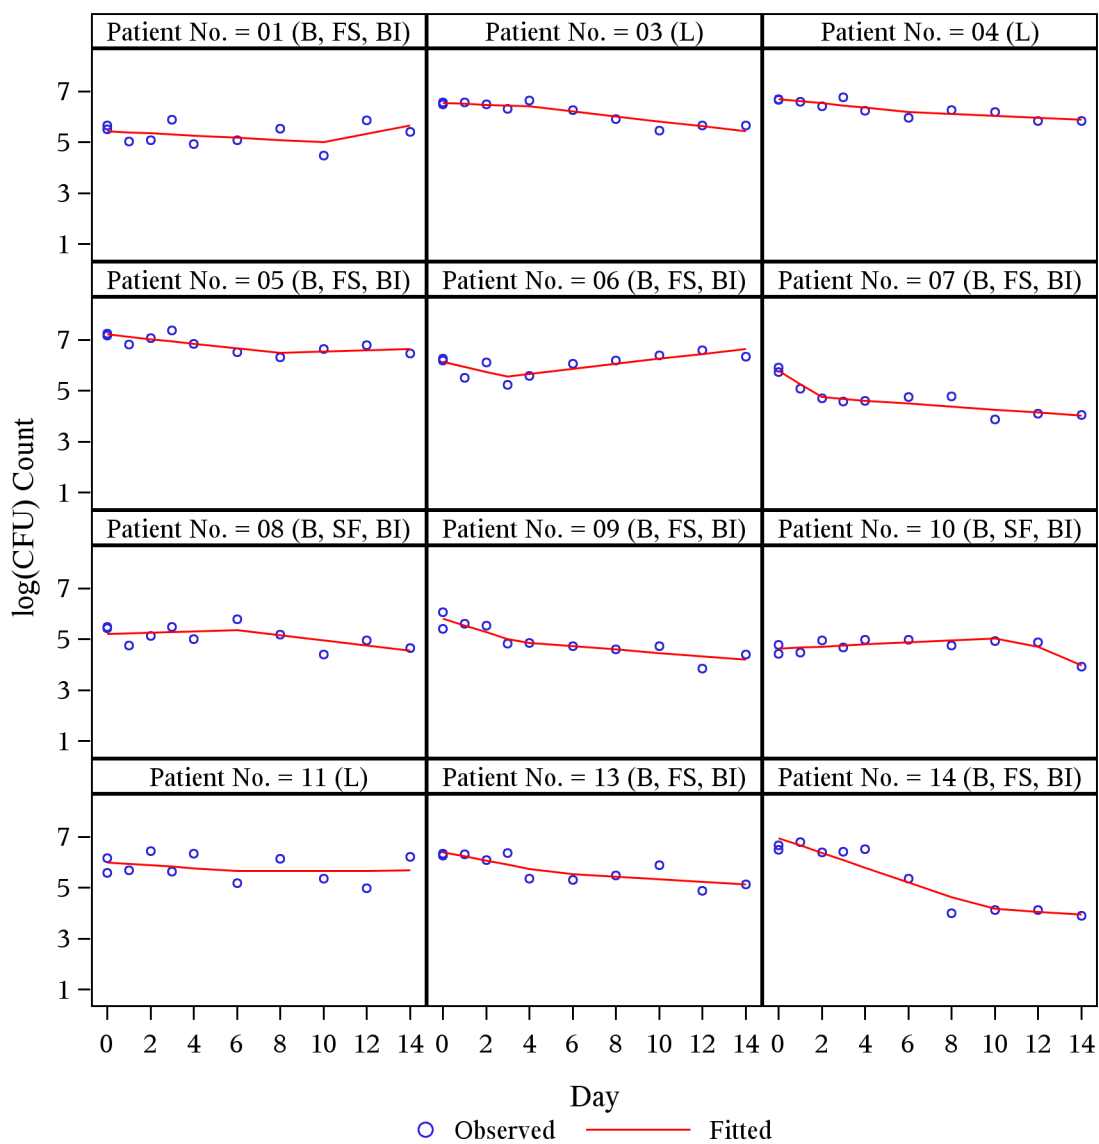

**Figure A.12:** Observed and Fitted log(CFU) Count

Trial CL010, Treatment PA-824 100 mg

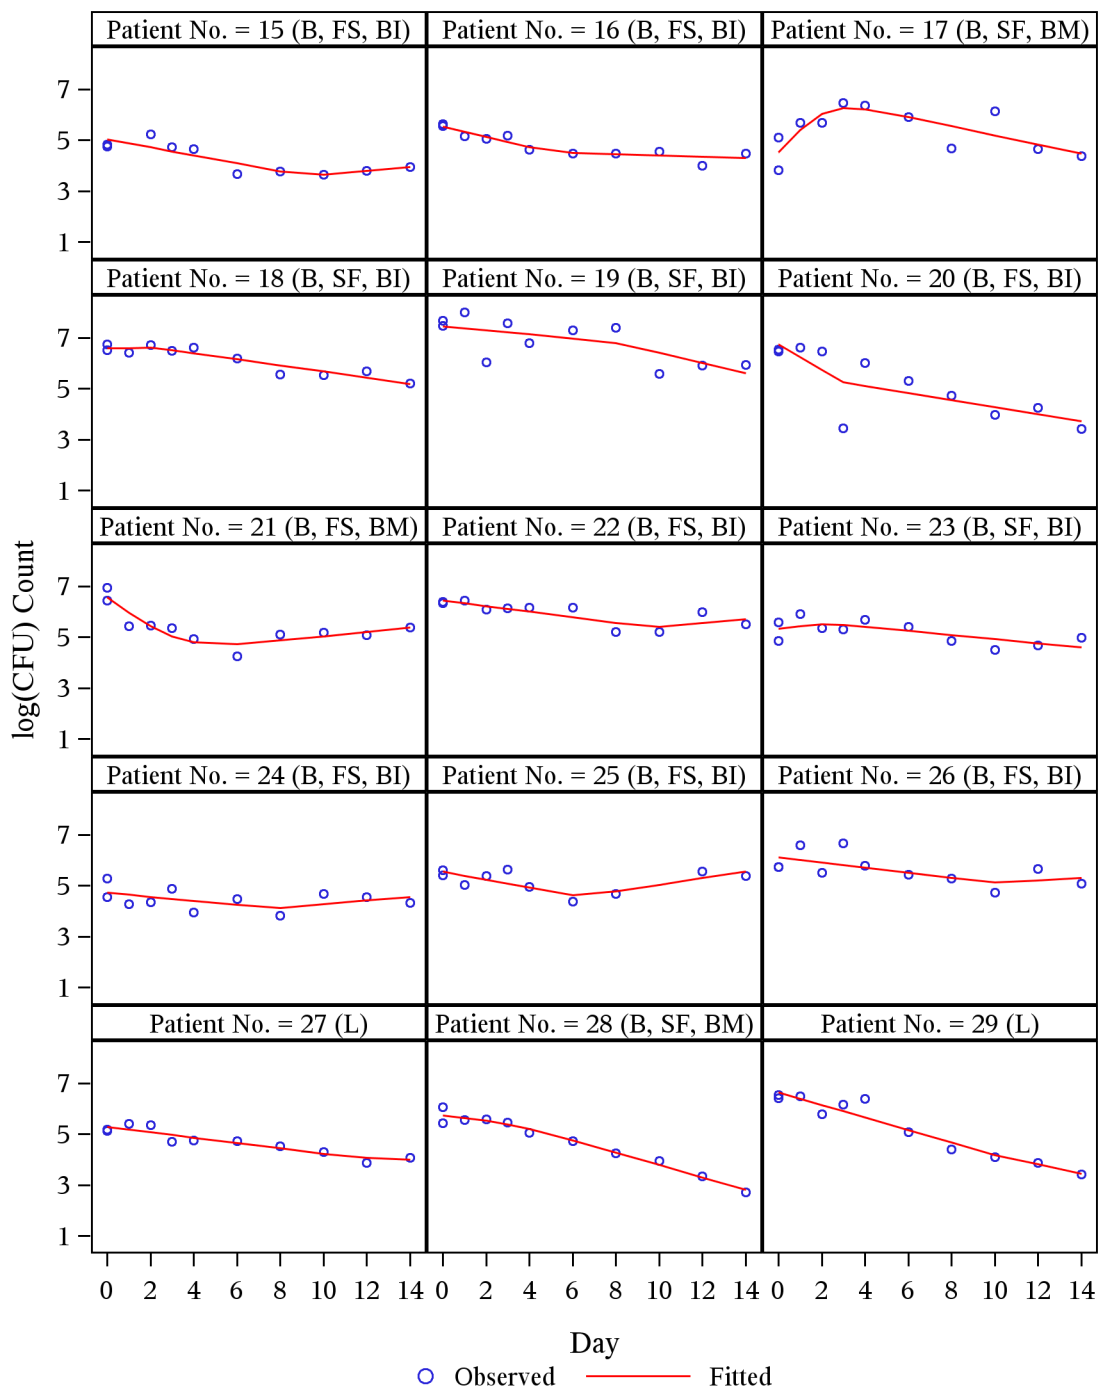

**Figure A.13:** Observed and Fitted log(CFU) Count

Trial CL010, Treatment PA-824 150 mg

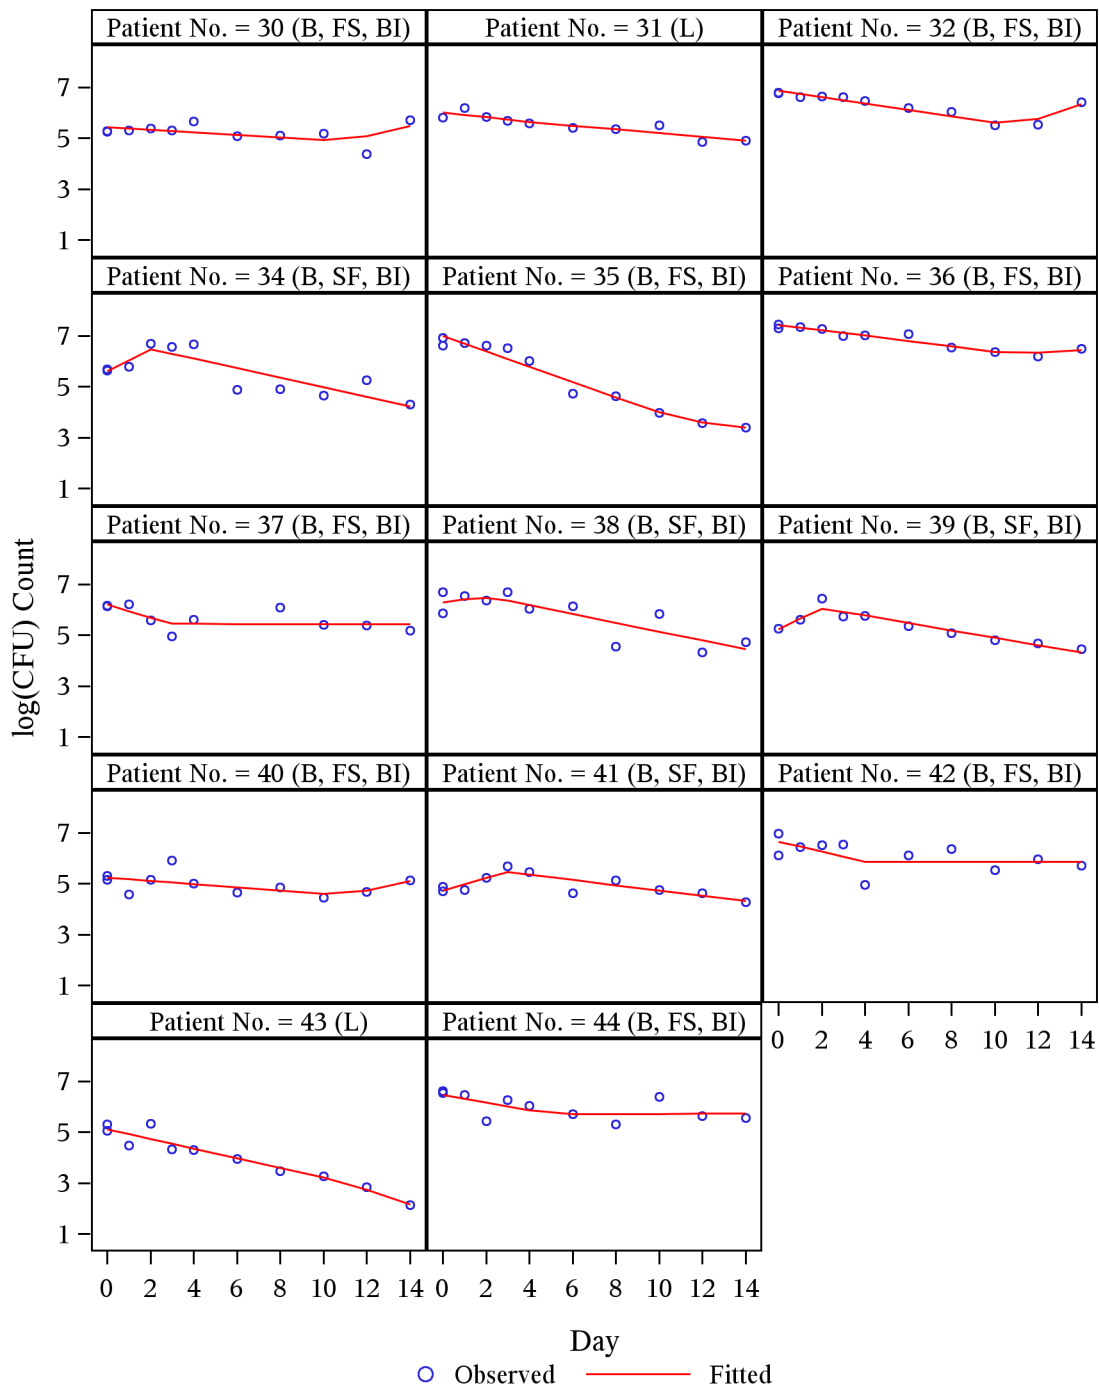

**Figure A.14:** Observed and Fitted log(CFU) Count

Trial CL010, Treatment PA-824 200 mg

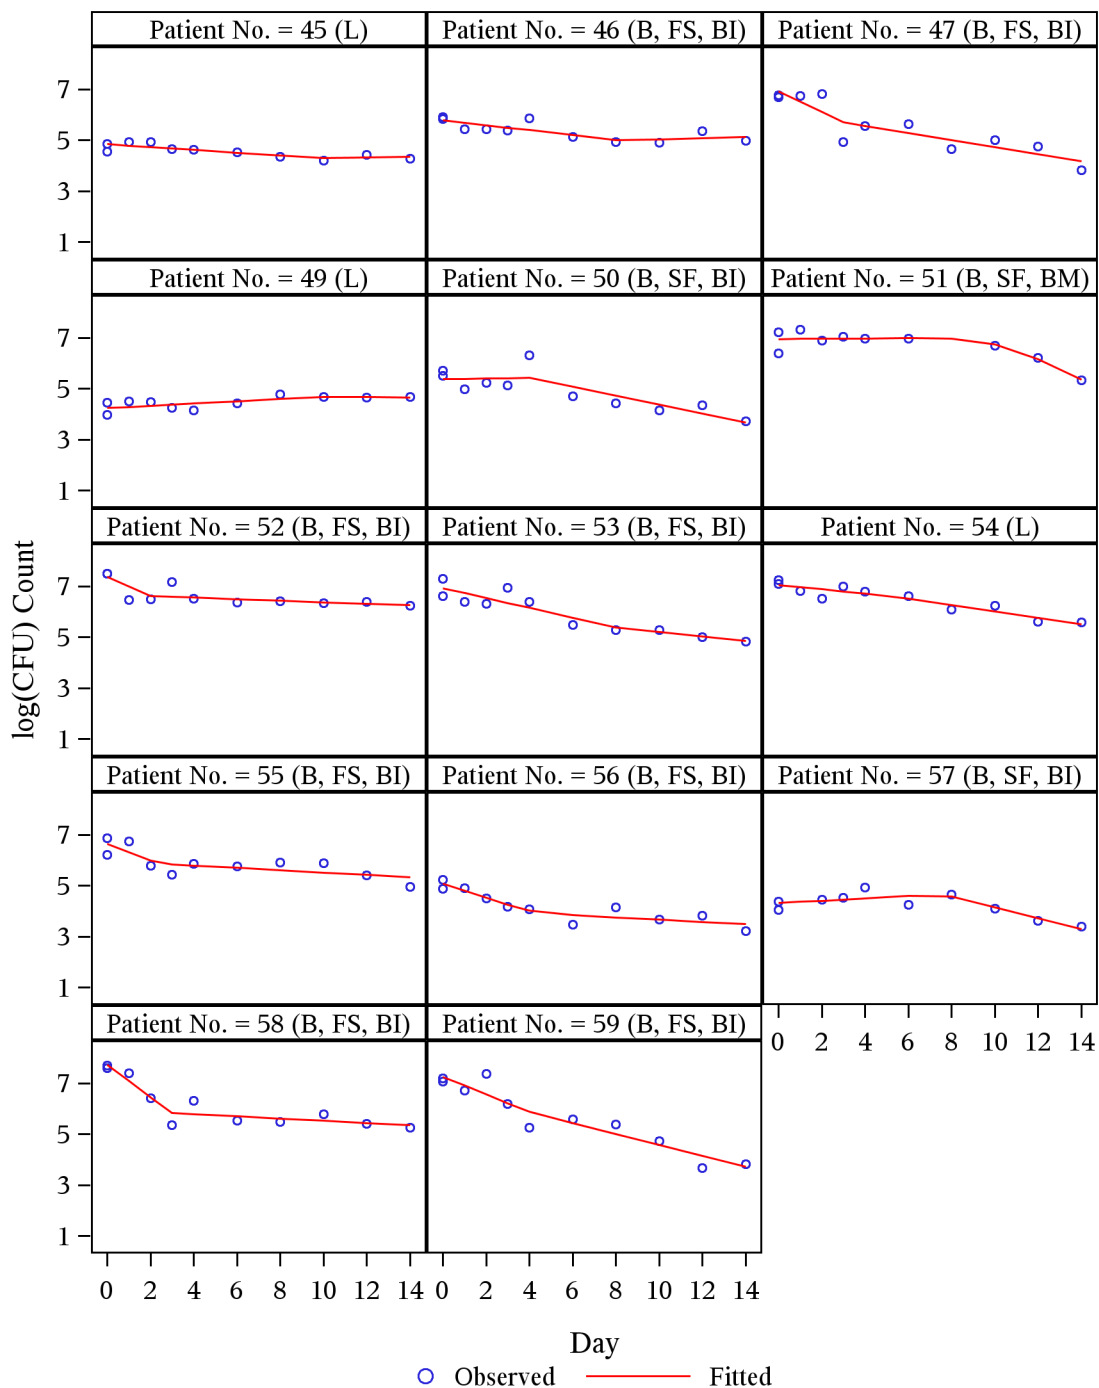



**Figure A.15:** Observed and Fitted  $\log(\text{CFU})$  Count  
 Trial **CL010**, Treatment **Rifafour**

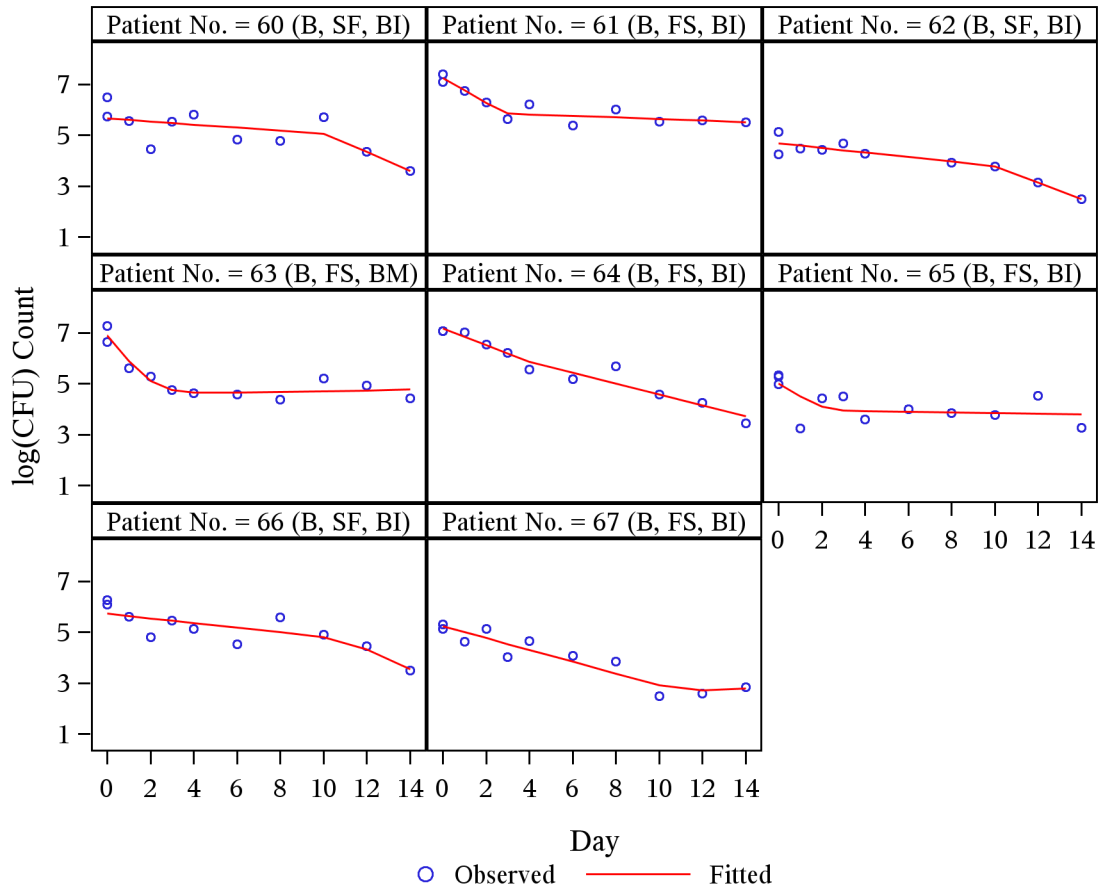

**Figure A.16:** Observed and Fitted log(CFU) Count

Trial NC001, Treatment J

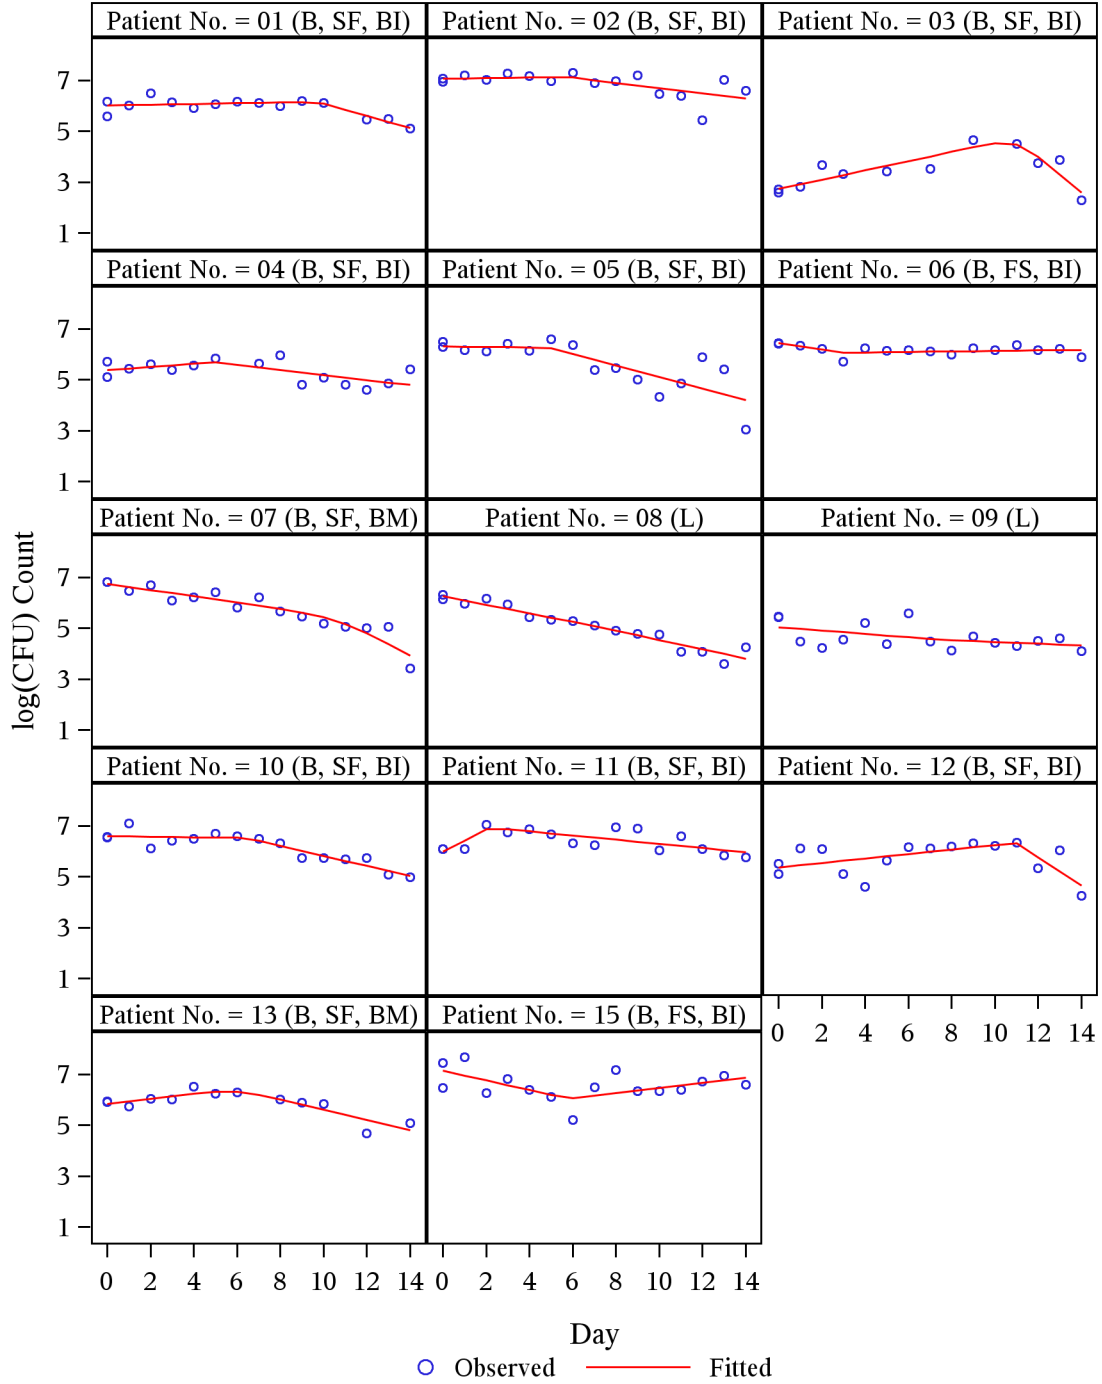

**Figure A.17:** Observed and Fitted  $\log(\text{CFU})$  Count

Trial NC001, Treatment J-Z

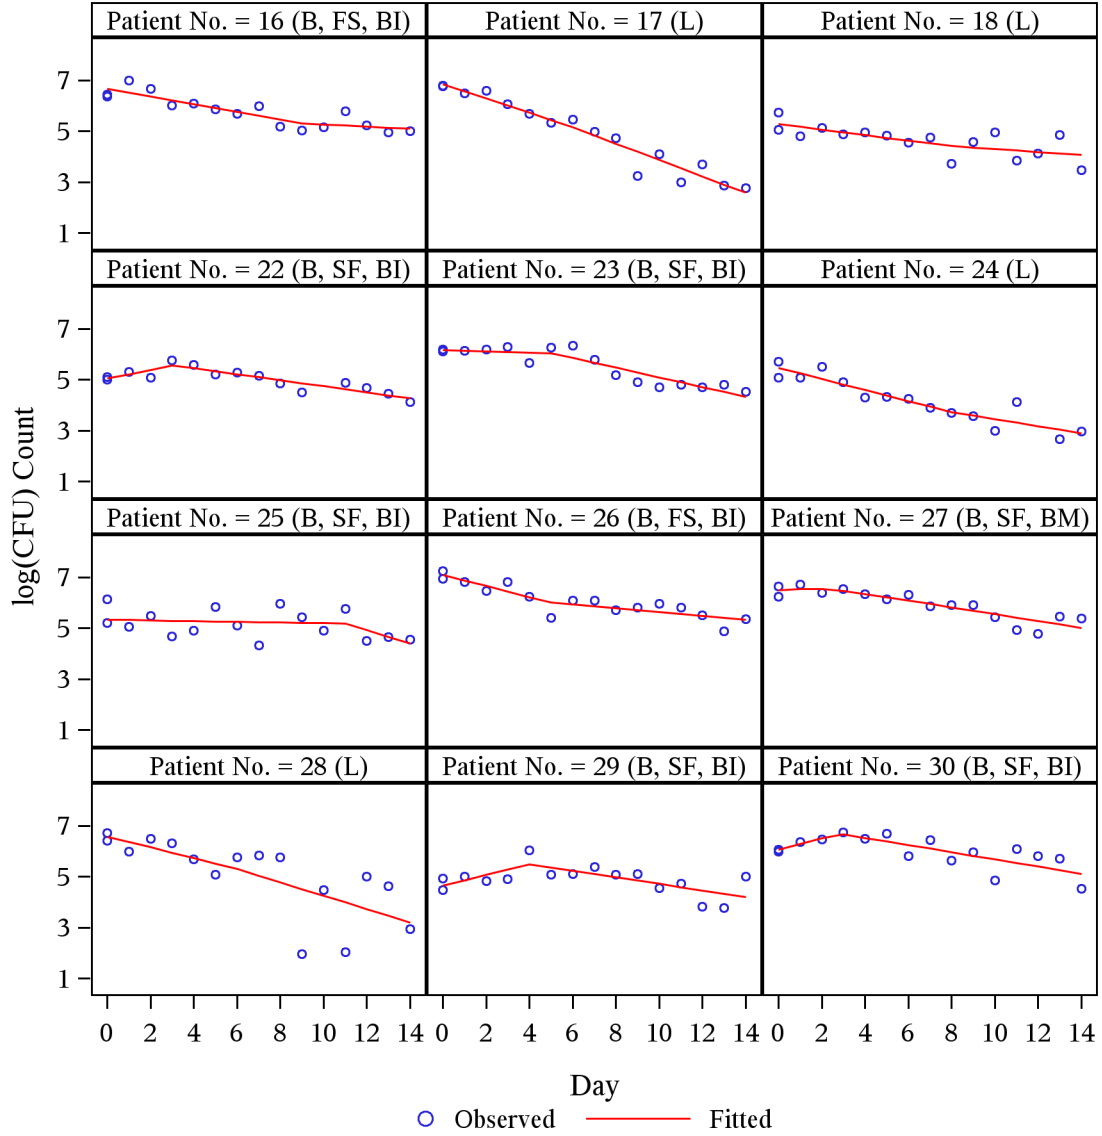

**Figure A.18:** Observed and Fitted log(CFU) Count

Trial NC001, Treatment J-Pa

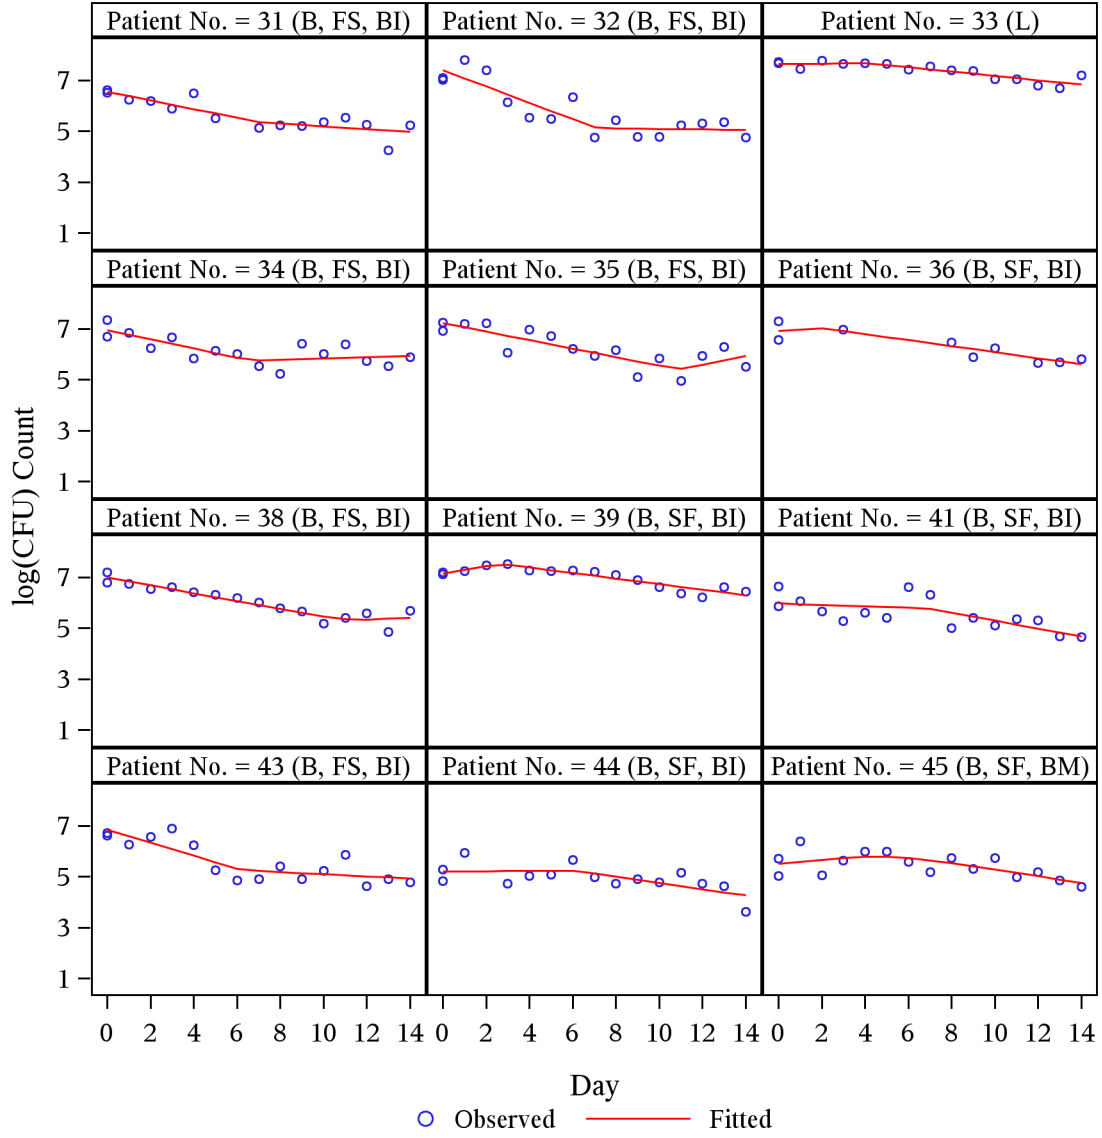

**Figure A.19:** Observed and Fitted log(CFU) Count

Trial NC001, Treatment **Pa-Z**

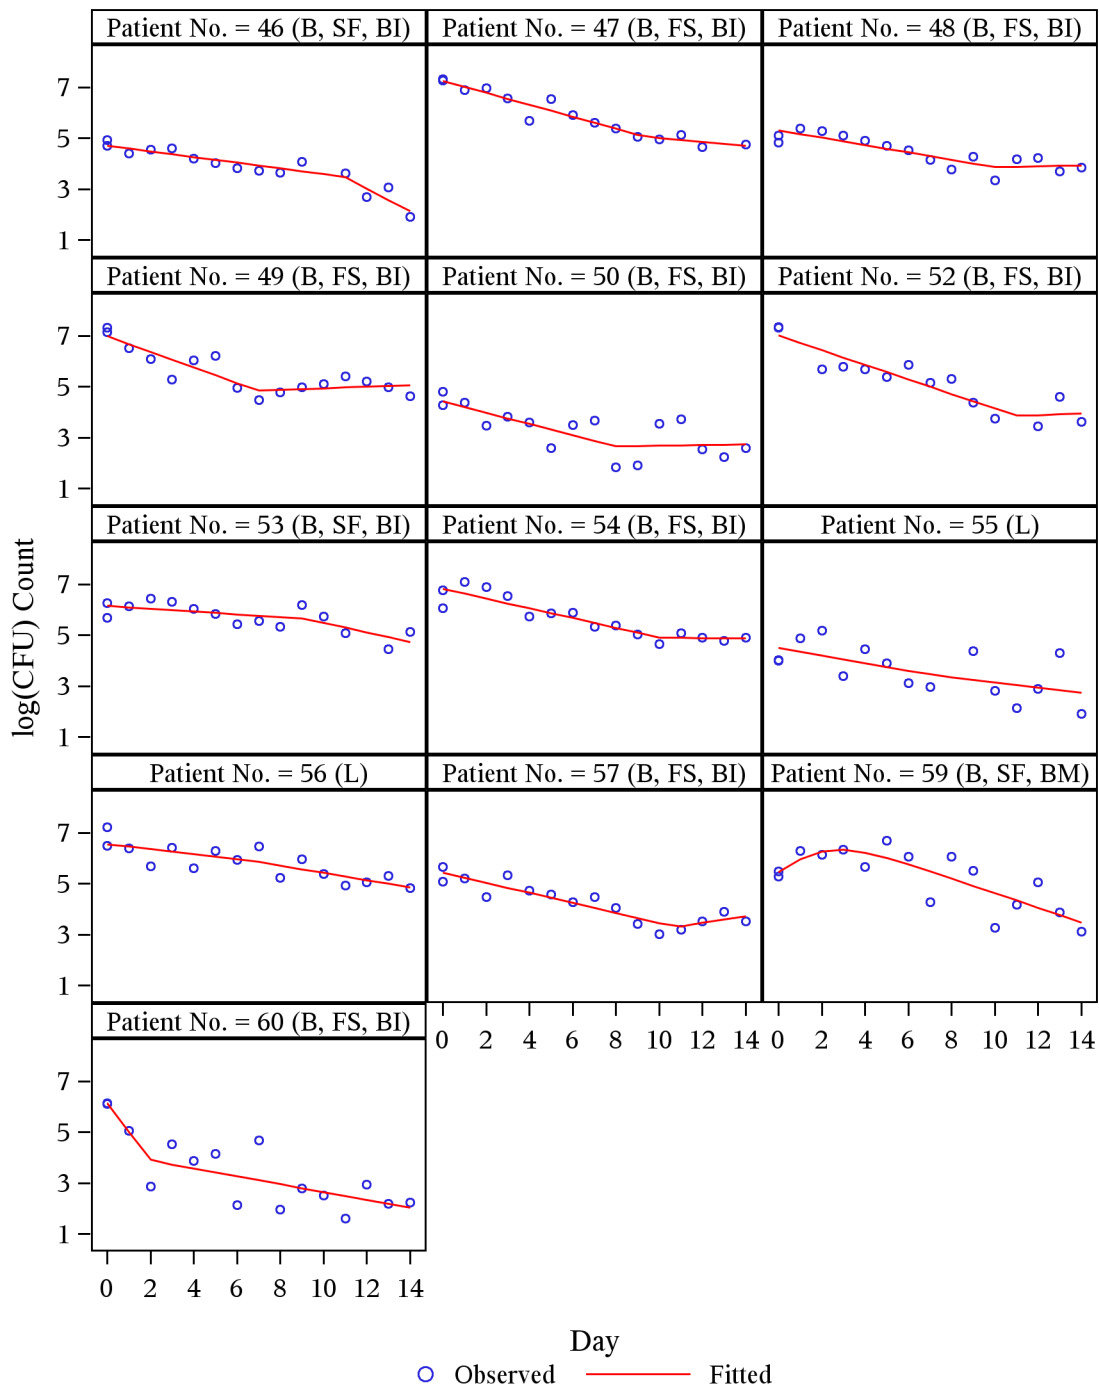

**Figure A.20:** Observed and Fitted log(CFU) Count

Trial NC001, Treatment Pa-Z-M

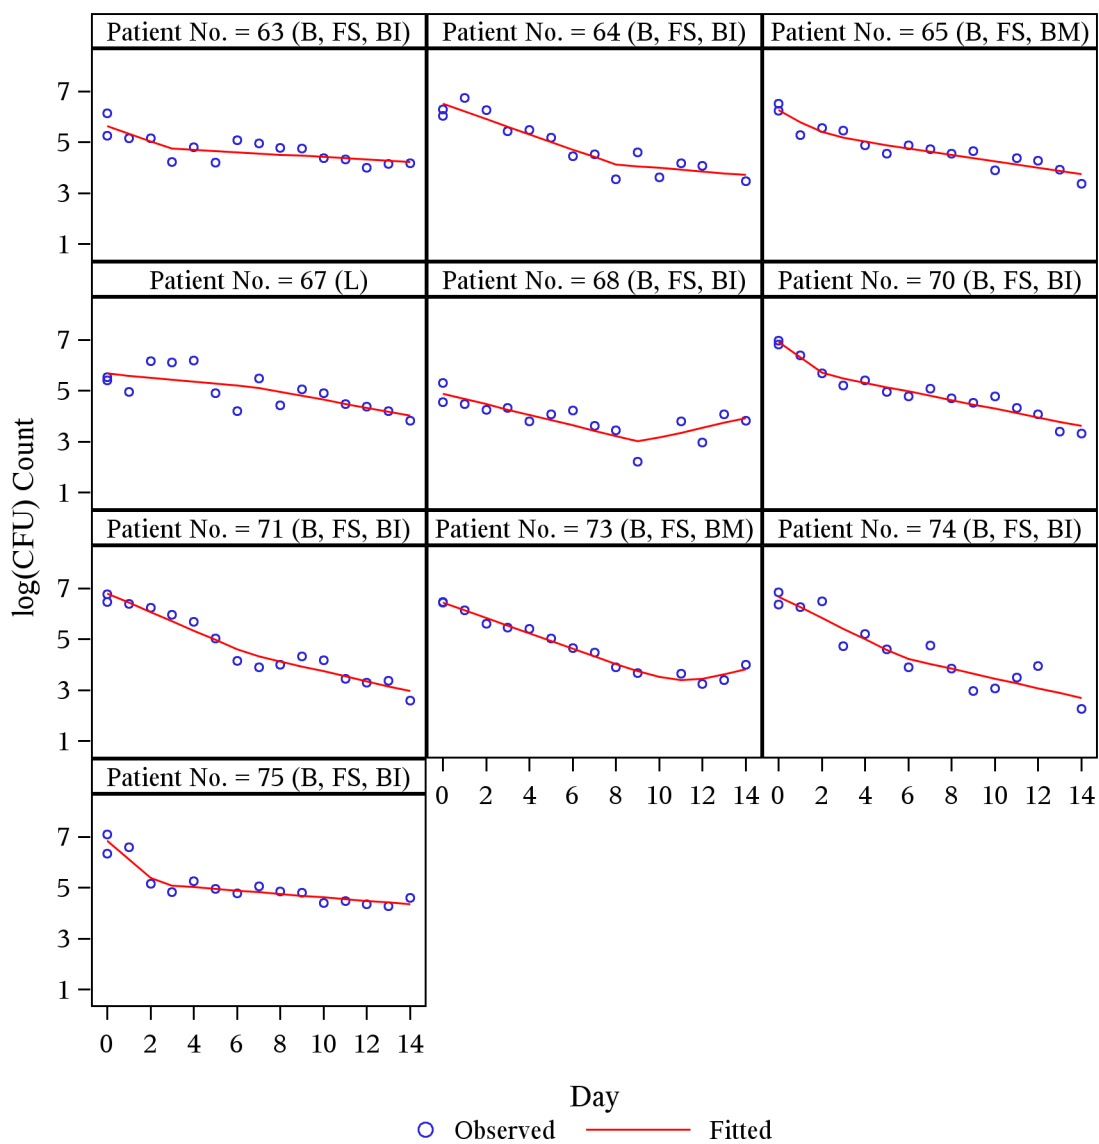

**Figure A.21:** Observed and Fitted  $\log(\text{CFU})$  Count

Trial **NC001**, Treatment **Rifafour**

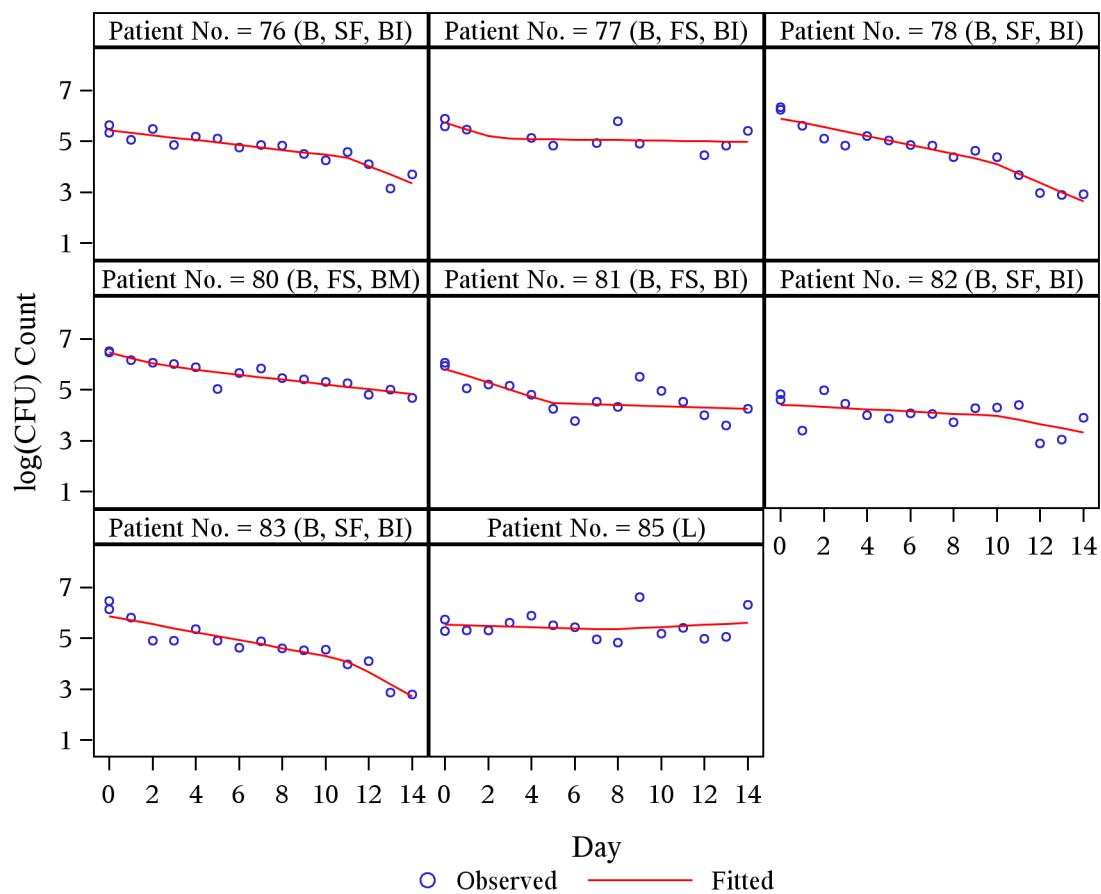

## B EXAMPLE OF APPLICATION: ADDITIONAL RESULTS

**Table B.1:** Model 1 – Inferential Statistics for Regression Model Parameters

| Parameter   | Treatment       | n  | Mean     |                 |
|-------------|-----------------|----|----------|-----------------|
|             |                 |    | Estimate | 95% BCI         |
| $\alpha$    | J (N=15)        | 15 | 5.965    | [5.362; 6.578]  |
|             | J-Z (N=15)      | 15 | 5.912    | [5.416; 6.392]  |
|             | J-Pa (N=15)     | 15 | 6.535    | [5.909; 7.152]  |
|             | Pa-Z (N=15)     | 15 | 5.934    | [5.380; 6.498]  |
|             | Pa-Z-M (N=15)   | 15 | 5.844    | [5.131; 6.560]  |
|             | Rifafour (N=10) | 10 | 5.507    | [4.923; 6.094]  |
| $\beta_1$   | J (N=15)        | 15 | 0.081    | [0.029; 0.132]  |
|             | J-Z (N=15)      | 15 | 0.116    | [0.057; 0.174]  |
|             | J-Pa (N=15)     | 15 | 0.100    | [0.059; 0.141]  |
|             | Pa-Z (N=15)     | 15 | 0.149    | [0.101; 0.199]  |
|             | Pa-Z-M (N=15)   | 15 | 0.262    | [0.136; 0.392]  |
|             | Rifafour (N=10) | 10 | 0.150    | [0.072; 0.230]  |
| $\lambda_1$ | J (N=15)        | 15 | -0.002   | [-0.088; 0.084] |
|             | J-Z (N=15)      | 15 | 0.066    | [-0.047; 0.172] |
|             | J-Pa (N=15)     | 15 | 0.105    | [0.018; 0.187]  |
|             | Pa-Z (N=15)     | 15 | 0.179    | [0.079; 0.278]  |
|             | Pa-Z-M (N=15)   | 15 | 0.316    | [0.159; 0.470]  |
|             | Rifafour (N=10) | 10 | 0.155    | [0.019; 0.299]  |

*Note:* Treatment Group: J = TMC207, J-Z = TMC207 + Pyrazinamide, J-Pa = TMC207 + PA-824, Pa-Z = PA-824 + Pyrazinamide, Pa-Z-M = PA-824 + Pyrazinamide + Moxifloxacin, Rifafour = Rifafour e-275<sup>®</sup>. EBA( $t_1 - t_2$ ): Early bactericidal activity over Day  $t_1$  to Day  $t_2$ ; BCI: Bayesian credibility interval. n = Number of patients in each category.



**Table B.1:** Model 1 – Inferential Statistics for Regression Model Parameters

| Parameter    | Treatment       | n  | Mean     |                 |
|--------------|-----------------|----|----------|-----------------|
|              |                 |    | Estimate | 95% BCI         |
| $\beta_2$    | J (N=15)        | 15 | 0.083    | [0.002; 0.167]  |
|              | J-Z (N=15)      | 15 | 0.051    | [-0.038; 0.140] |
|              | J-Pa (N=15)     | 15 | -0.005   | [-0.080; 0.073] |
|              | Pa-Z (N=15)     | 15 | -0.030   | [-0.118; 0.059] |
|              | Pa-Z-M (N=15)   | 15 | -0.053   | [-0.223; 0.136] |
|              | Rifafour (N=10) | 10 | -0.004   | [-0.128; 0.118] |
| $\beta_{2f}$ | J (N=15)        | 15 | 0.083    | [-0.213; 0.384] |
|              | J-Z (N=15)      | 15 | 0.050    | [-0.290; 0.387] |
|              | J-Pa (N=15)     | 15 | -0.004   | [-0.268; 0.267] |
|              | Pa-Z (N=15)     | 15 | -0.030   | [-0.345; 0.285] |
|              | Pa-Z-M (N=15)   | 15 | -0.054   | [-0.651; 0.563] |
|              | Rifafour (N=10) | 10 | -0.003   | [-0.381; 0.388] |
| $\lambda_2$  | J (N=15)        | 15 | 0.164    | [0.064; 0.275]  |
|              | J-Z (N=15)      | 15 | 0.167    | [0.064; 0.271]  |
|              | J-Pa (N=15)     | 15 | 0.095    | [0.008; 0.184]  |
|              | Pa-Z (N=15)     | 15 | 0.119    | [0.014; 0.219]  |
|              | Pa-Z-M (N=15)   | 15 | 0.209    | [-0.051; 0.492] |
|              | Rifafour (N=10) | 10 | 0.146    | [-0.006; 0.299] |

*Note:* Treatment Group: J = TMC207, J-Z = TMC207 + Pyrazinamide, J-Pa = TMC207 + PA-824, Pa-Z = PA-824 + Pyrazinamide, Pa-Z-M = PA-824 + Pyrazinamide + Moxifloxacin, Rifafour = Rifafour e-275<sup>®</sup>. EBA( $t_1 - t_2$ ): Early bactericidal activity over Day  $t_1$  to Day  $t_2$ ; BCI: Bayesian credibility interval. n = Number of patients in each category.

**Table B.1:** Model 1 – Inferential Statistics for Regression Model Parameters

| Parameter | Treatment       | n  | Mean     |                 |
|-----------|-----------------|----|----------|-----------------|
|           |                 |    | Estimate | 95% BCI         |
| $\kappa$  | J (N=15)        | 15 | 7.568    | [2.797; 10.810] |
|           | J-Z (N=15)      | 15 | 4.718    | [2.088; 10.030] |
|           | J-Pa (N=15)     | 15 | 7.448    | [2.642; 10.810] |
|           | Pa-Z (N=15)     | 15 | 7.799    | [2.614; 10.880] |
|           | Pa-Z-M (N=15)   | 15 | 4.561    | [2.083; 9.941]  |
|           | Rifafour (N=10) | 10 | 5.446    | [2.116; 10.570] |
| $\gamma$  | J (N=15)        | 15 | 1.043    | [0.147; 1.953]  |
|           | J-Z (N=15)      | 15 | 1.096    | [0.154; 1.958]  |
|           | J-Pa (N=15)     | 15 | 1.069    | [0.150; 1.955]  |
|           | Pa-Z (N=15)     | 15 | 1.067    | [0.149; 1.954]  |
|           | Pa-Z-M (N=15)   | 15 | 1.029    | [0.143; 1.950]  |
|           | Rifafour (N=10) | 10 | 1.069    | [0.151; 1.955]  |

*Note:* Treatment Group: J = TMC207, J-Z = TMC207 + Pyrazinamide, J-Pa = TMC207 + PA-824, Pa-Z = PA-824 + Pyrazinamide, Pa-Z-M = PA-824 + Pyrazinamide + Moxifloxacin, Rifafour = Rifafour e-275<sup>®</sup>. EBA( $t_1 - t_2$ ): Early bactericidal activity over Day  $t_1$  to Day  $t_2$ ; BCI: Bayesian credibility interval. n = Number of patients in each category.

**Figure B.1:** Model 2 – Posterior Estimates and Corresponding 95% BCIs for Mean  $\log(\text{CFU})$  Count Over Time

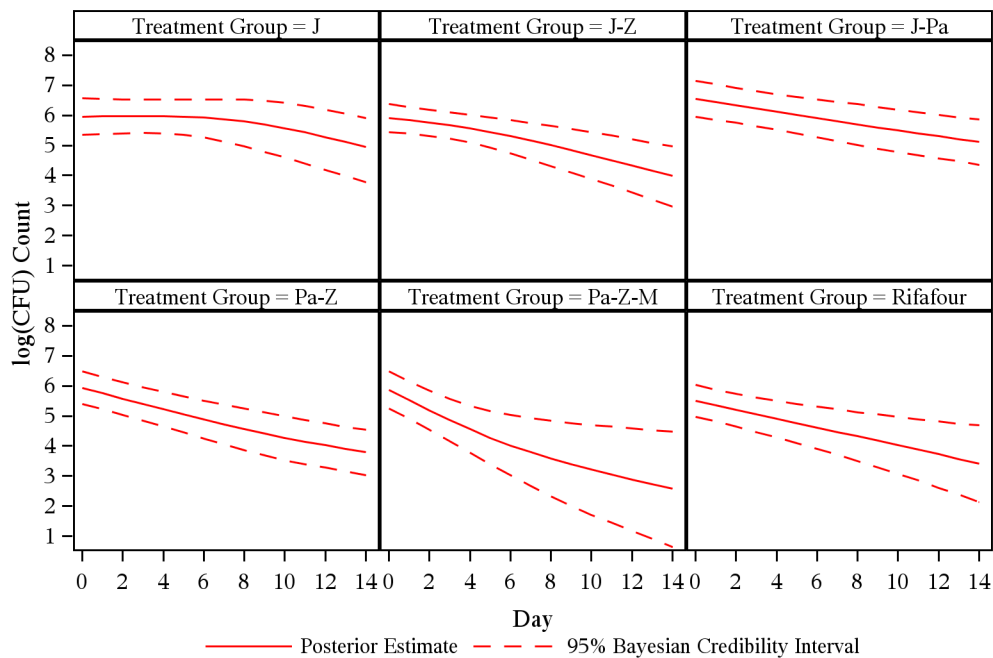

**Figure B.2:** Model 3 – Posterior Estimates and Corresponding 95% BCIs for Mean  $\log(\text{CFU})$  Count Over Time

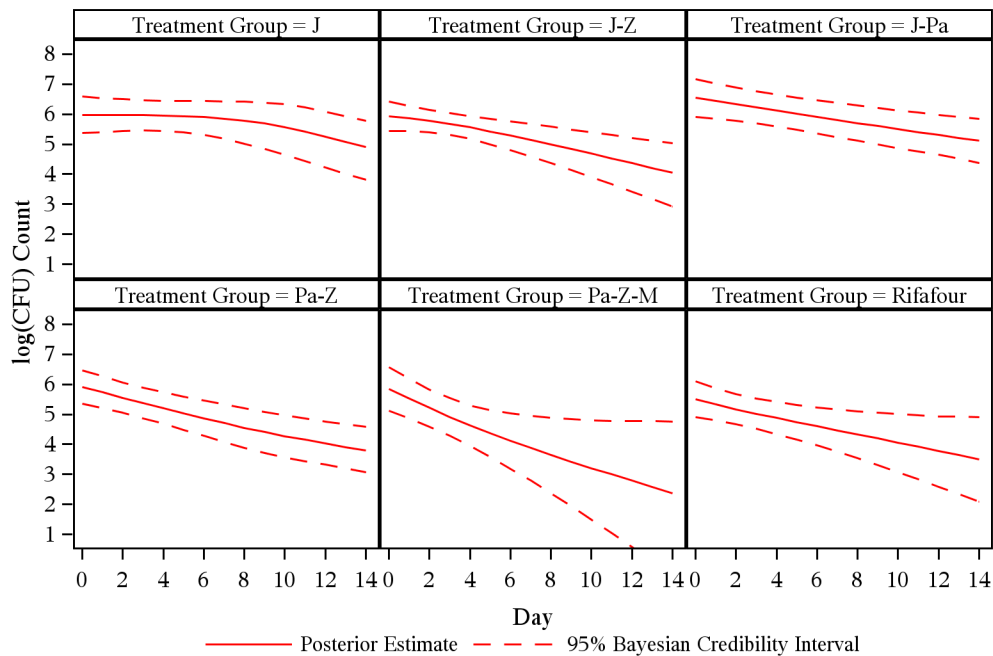

**Figure B.3:** Model 4 – Posterior Estimates and Corresponding 95% BCIs for Mean  $\log(\text{CFU})$  Count Over Time

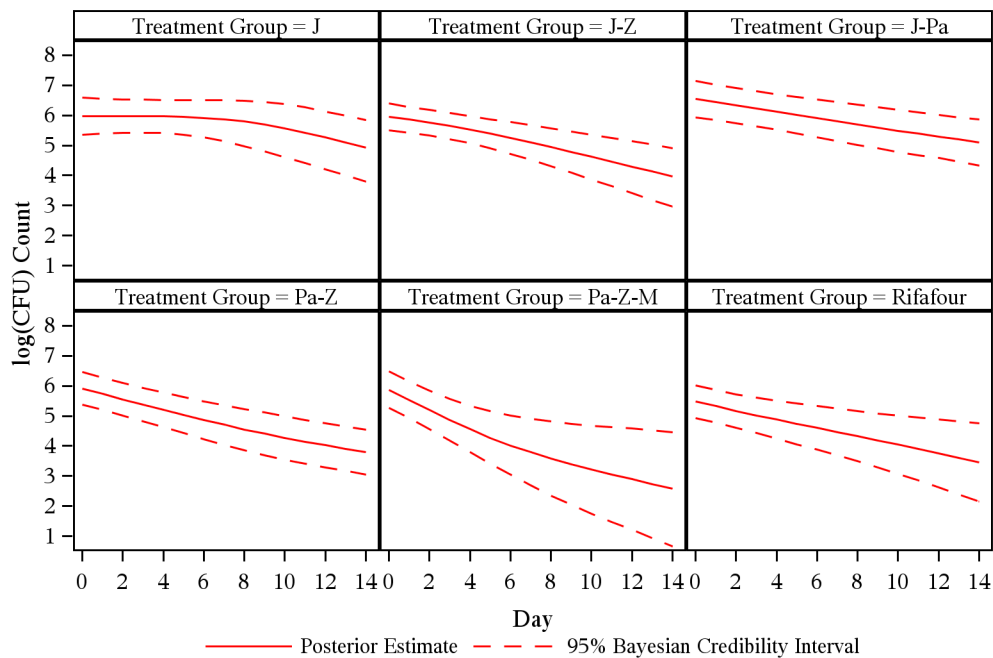

**Figure B.4:** Model 5 – Posterior Estimates and Corresponding 95% BCIs for Mean  $\log(\text{CFU})$  Count Over Time

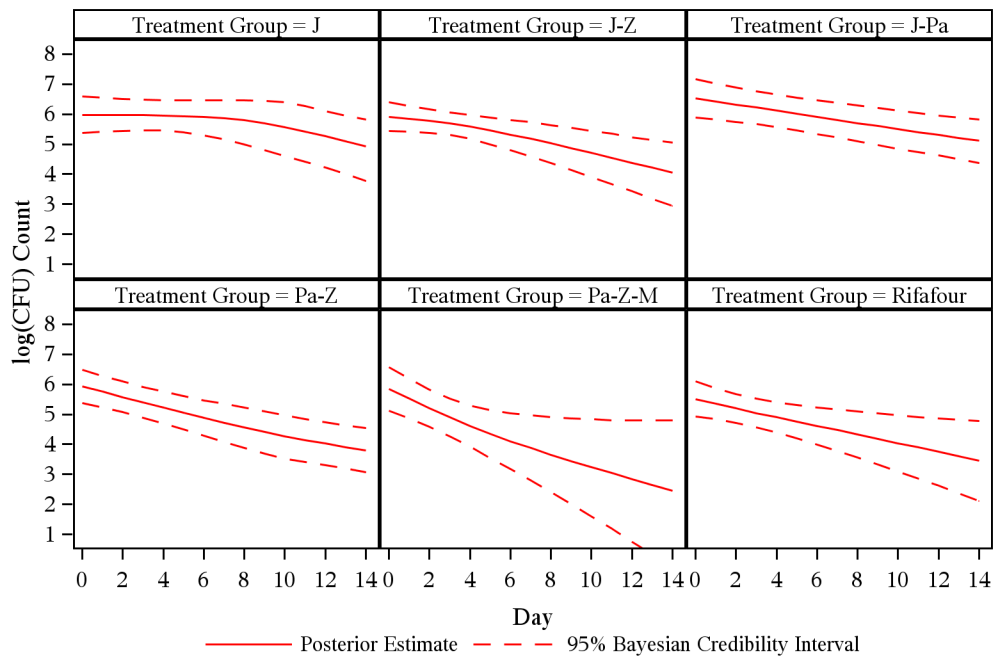

**Figure B.5:** Model 6 – Posterior Estimates and Corresponding 95% BCIs for Mean  $\log(\text{CFU})$  Count Over Time

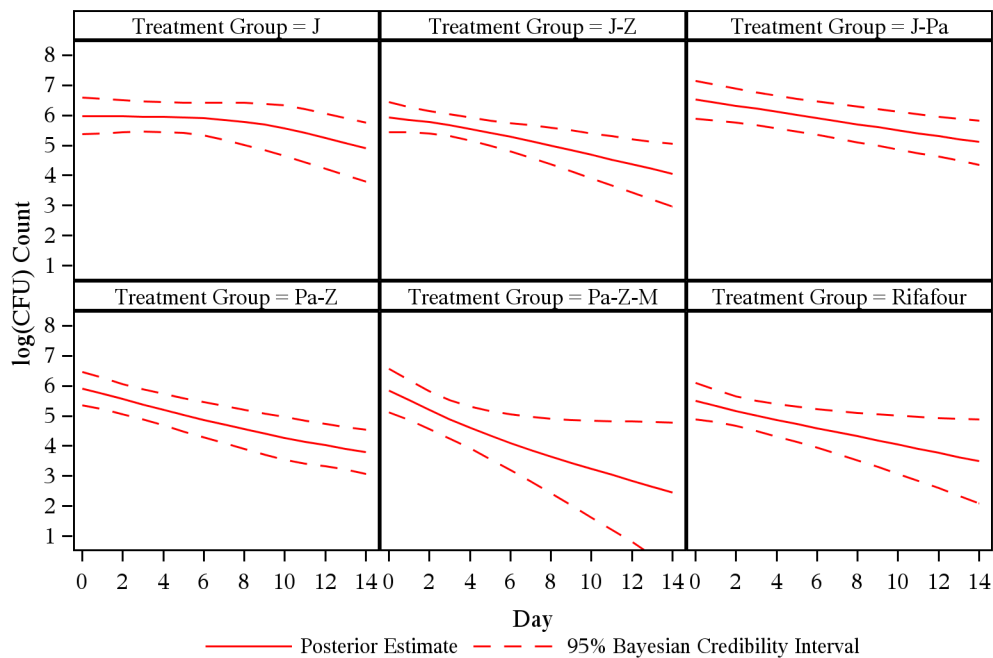

**Figure B.6:** Model 7 – Posterior Estimates and Corresponding 95% BCIs for Mean  $\log(\text{CFU})$  Count Over Time

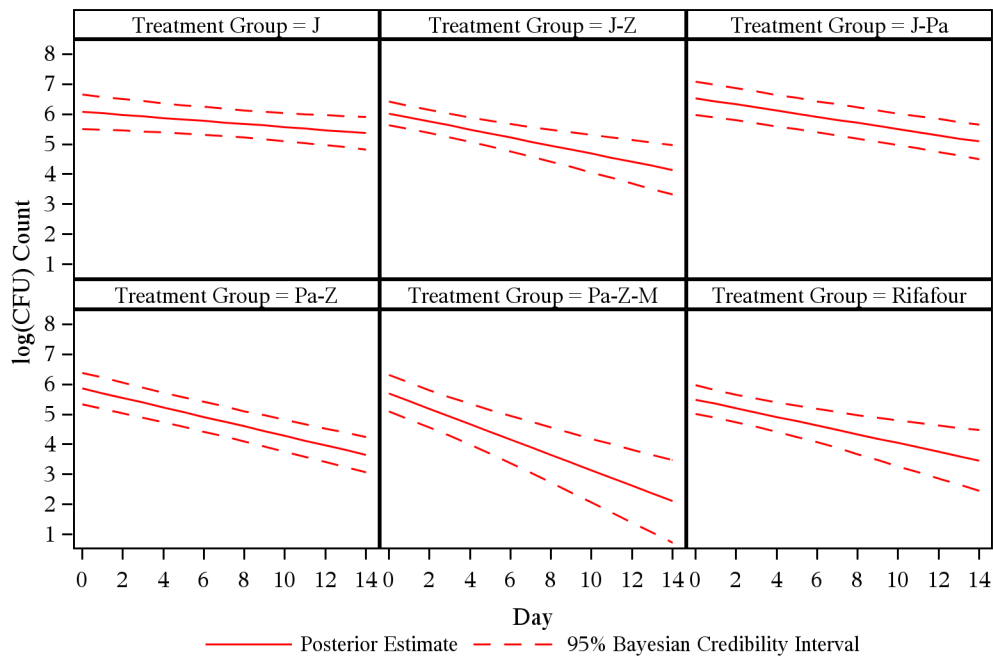

**Figure B.7:** Model 8 – Posterior Estimates and Corresponding 95% BCIs for Mean  $\log(\text{CFU})$  Count Over Time

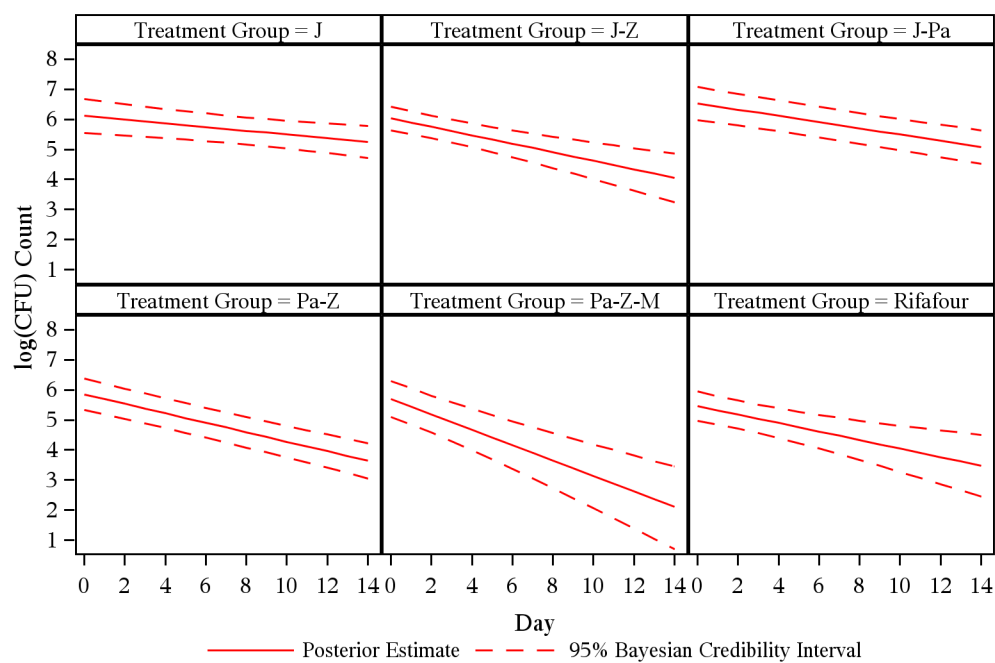

Supplement: Supplementary file 1 [file 5]
